# Supplementary material for: Genetic switches designed for eukaryotic cells and controlled by serine integrases
Source: PubMed Central journal article supplement (PMC7244727; doi:10.1038/s42003-020-0971-8), 2020-05-22
Supplement: 42003_2020_971_MOESM1_ESM.pdf [file 42003_2020_971_MOESM1_ESM.pdf]

# Supplementary Information

## Genetic switches designed for eukaryotic cells and controlled by serine integrases

Mayna S. Gomide<sup>1,2,3</sup>, Thais T. Sales<sup>1,2</sup>, Luciana R.C. Barros<sup>4</sup>, Cintia G. Limia<sup>4</sup>, Marco A. de Oliveira<sup>1,2</sup>, Lilian H. Florentino<sup>1</sup>, Leila M.G. Barros<sup>1</sup>, Maria L. Robledo<sup>4</sup>, Gustavo P.C. José<sup>1</sup>, Mariana S.M. Almeida<sup>1</sup>, Rayane N. Lima<sup>1</sup>, Stevens K. Rehen<sup>5,6</sup>, Cristiano Lacorte<sup>1</sup>, Eduardo O. Melo<sup>1,7</sup>, André M. Murad<sup>1</sup>, Martín H. Bonamino<sup>4,8\*</sup>, Cintia M. Coelho<sup>9\*</sup> and Elibio Rech<sup>1\*</sup>.

1 Brazilian Agriculture Research Corporation – Embrapa – Genetic Resources and Biotechnology – CENARGEN, Brasília, 70770917, DF, Brazil;

2 Department of Cell Biology, Institute of Biological Science, University of Brasília, Brasília, 70910900, DF, Brazil;

3 School of Medicine, Federal University of Juiz de Fora, Juiz de Fora, 36036900, MG, Brazil;

4 Molecular Carcinogenesis Program, Research Coordination, National Cancer Institute (INCA), Rio de Janeiro, 20231050, RJ, Brazil;

5 D'Or Institute for Research and Education (IDOR), Rio de Janeiro, 22.281-100, RJ, Brazil;

6 Institute of Biomedical Sciences, Federal University of Rio de Janeiro, Rio de Janeiro, 21941-902, RJ, Brazil;

7 Graduation Program in Biotechnology, Federal University of Tocantins, Gurupi, 77402-970, TO, Brazil;

8 Vice-Presidency of Research and Biological Collections (VPPCB), FIOCRUZ – Oswaldo Cruz Foundation Institute, Rio de Janeiro, 21040900, RJ, Brazil;

9 Department of Genetic and Morphology, Institute of Biological Science, University of Brasília, Brasília, 70910900, DF, Brazil;

\* Corresponding authors (emails: [elibio.rech@embrapa.br](mailto:elibio.rech@embrapa.br); [cintiacoeilhom@unb.br](mailto:cintiacoeilhom@unb.br); and [mbonamino@inca.gov.br](mailto:mbonamino@inca.gov.br)).

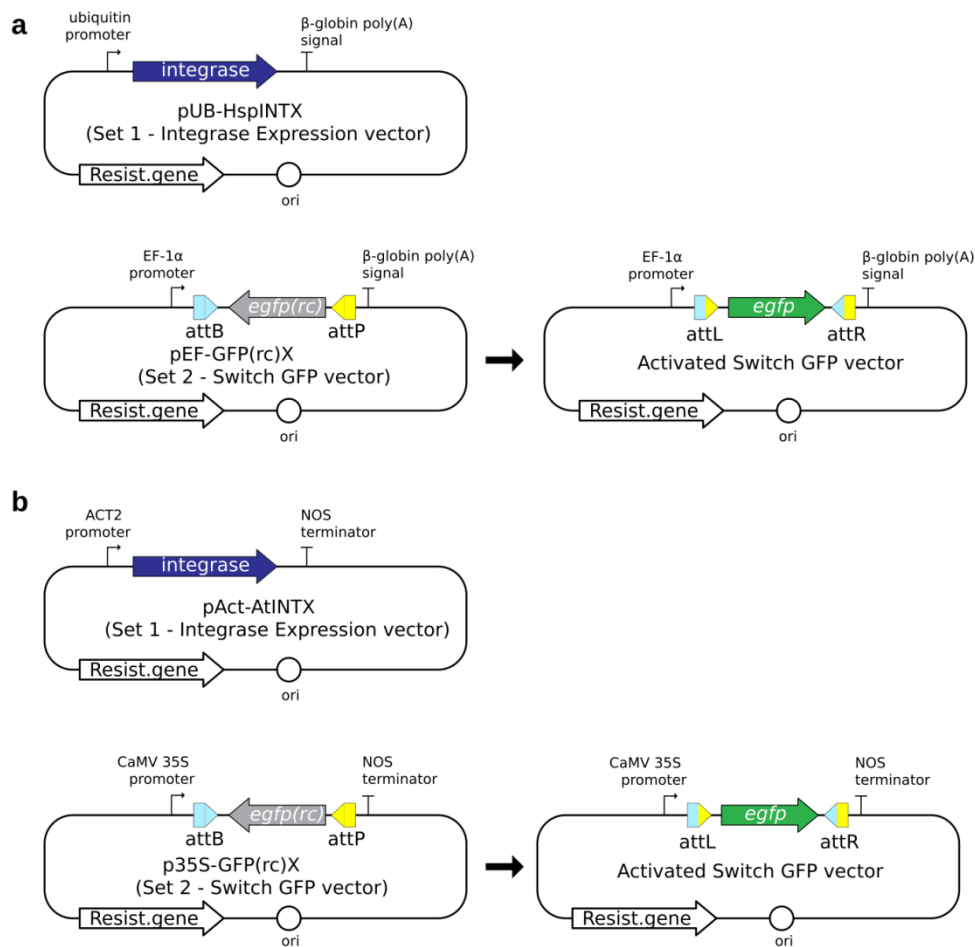

**Supplementary Figure 1.** Schematic representation of the vector sets synthesized for the eukaryotic genetic switches and the resulting activated vector. For human, bovine, and plant cells, two sets of plasmids were built to evaluate Int functionality. **a** For mammalian systems, one plasmid contains the human codon optimized sequence of Int X (X= 2, 4, 5, 7, 9, 13, phiC31 or Bxb1) under the control of the ubiquitin promoter and β-globin poly(A) signal terminator; this set was named the integrase expression vector (pIE) set, composed of plasmids named pUB-HspINTX. The other plasmid is composed of the reporter *egfp* gene in the reverse complement (rc) orientation flanked by the recognition sites *attB/attP* of that particular Int, under the control of a different strong constitutive promoter, namely, the EF1alpha promoter, and the same terminator; this set was named the switch GFP vector (pSG), with plasmids named pEF-GFP(rc)X. **b** For plant protoplasts, the pIE vectors set contains the *A. thaliana* codon optimized sequence of Int X under the actin2 promoter and the NOS terminator, plasmids named pAct-AtINTX. The pSG vectors set has the *egfp* sequence in the reverse complement orientation flanked by the recognition sites *attB/attP* of that particular Int, under the control of the CaMV 35S promoter and the same terminator, plasmids named p35S-GFP(rc)X (additional information on the plasmids is provided in Supplementary Table 1). Both plasmids of each set were used to cotransfect/cotransform the mammalian and plant systems. It was hypothesized that if a particular Int was functional, it would switch the *egfp* coding sequence to the forward orientation, leading to EGFP expression and formation of the *attL/attR* sites (activated switch GFP vector).

| INTEGRASE | NLS                                                                     |
|-----------|-------------------------------------------------------------------------|
| INT_02    | <sup>158</sup> RTTRLNAKRGGAHGPVDPGYKRRYPD <sup>184</sup> [6.0]          |
| INT_04    | <sup>260</sup> RERQRRRLGIEENHYTIPFQAKYMLSKFLRC <sup>290</sup> [5.9]     |
| INT_05    |                                                                         |
| INT_07    | <sup>131</sup> RENLAERVKFGIEQMIDEGKKPGGHSPYGYKFDKD <sup>165</sup> [5.4] |
| INT_09    | <sup>13</sup> EQKEKGHSIEEQERKLRAYS DINDWKIHKVY <sup>43</sup> [5.3]      |
| INT_13    | <sup>283</sup> VNRFIKKRKDGTEYC <sup>297</sup> [8.5]                     |
| Bxb1      | <sup>52</sup> PFDRKRRPNL <sup>61</sup> [5.0]                            |
| PhiC31    | <sup>221</sup> REIKTHKHLPFKPGSQAAIHGPSITGLCKRMDAD <sup>254</sup> [4.8]  |

**Supplementary Figure 2.** *In silico* prediction of the nuclear localization signal (NLS) for the Int coding sequences. The NLS was predicted using NLS Mapper (available at [http://nls-mapper.iab.keio.ac.jp/cgi-bin/NLS\\_Mapper\\_form.cgi](http://nls-mapper.iab.keio.ac.jp/cgi-bin/NLS_Mapper_form.cgi), accessed in 10/08/2018) with an intermediate cut-off score (5.0). The positions of the first and last amino acids of the predicted NLS sequence are denoted as superscripted numbers. The basic amino acids arginine (R) and lysine (K) are highlighted in cyan. Scores are indicated in brackets.

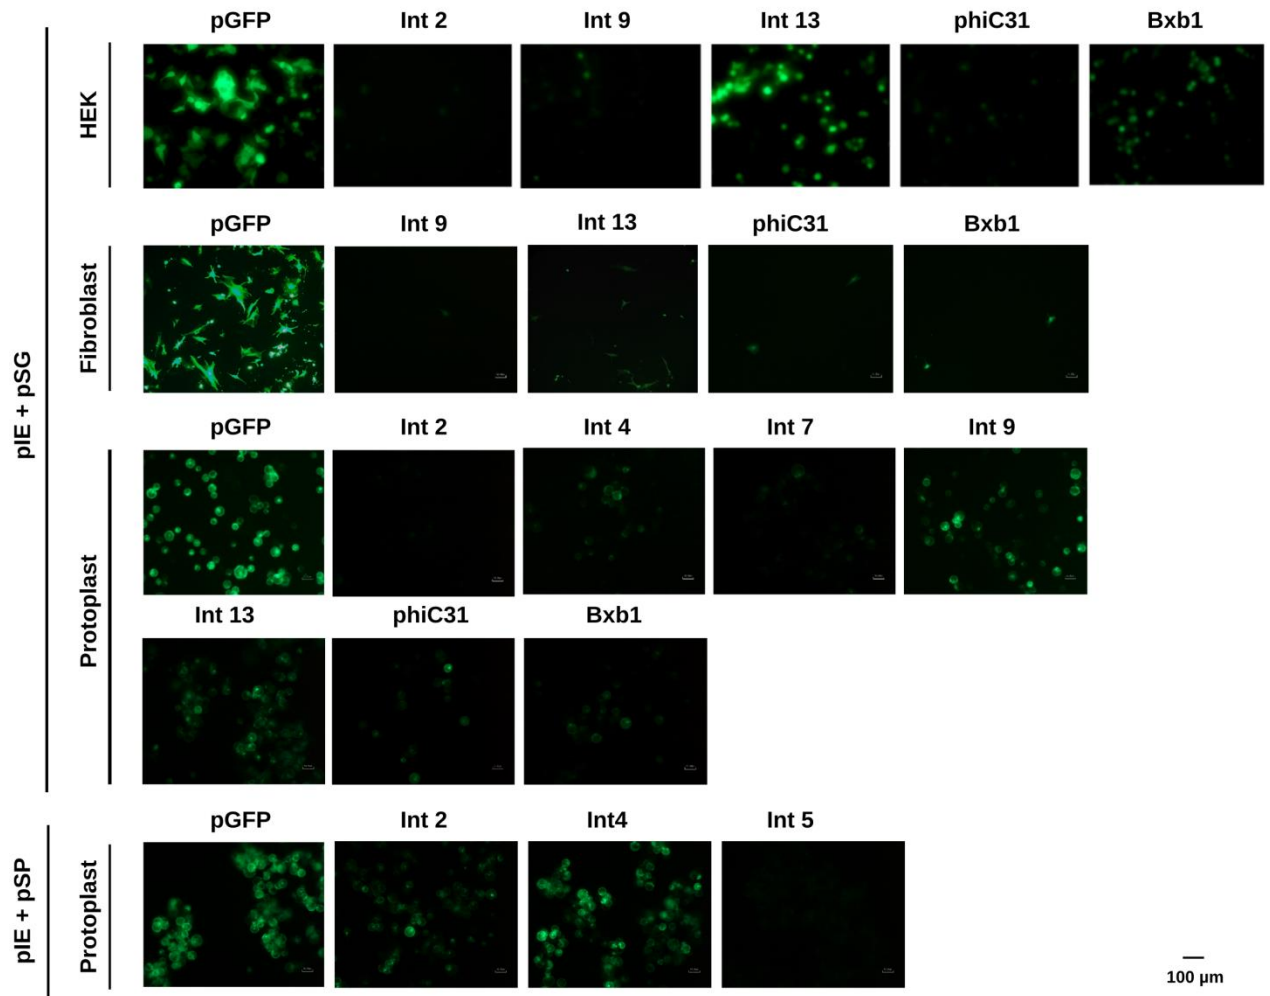

**Supplementary Figure 3.** Representative EGFP fluorescence images of the three model eukaryotic cell systems cotransfected/cotransformed with integrase expression (pIE) and switch GFP or promoter (pSG or pSP) vectors. HEK 293T cells, bovine fibroblasts and plant protoplasts were observed using an Axiovert 135M (Carl Zeiss) fluorescence microscope. The images were acquired using an attached DS-Ri1 digital camera (Nikon) and the capture software Nikon Digital Sight DS-L3 (Nikon) under a UV light with filter set 15 (Carl Zeiss). Excitation: BP 546; beam splitter: FT 580; emission: LP 590. For each cell model, all images were acquired with the same acquisition setting.

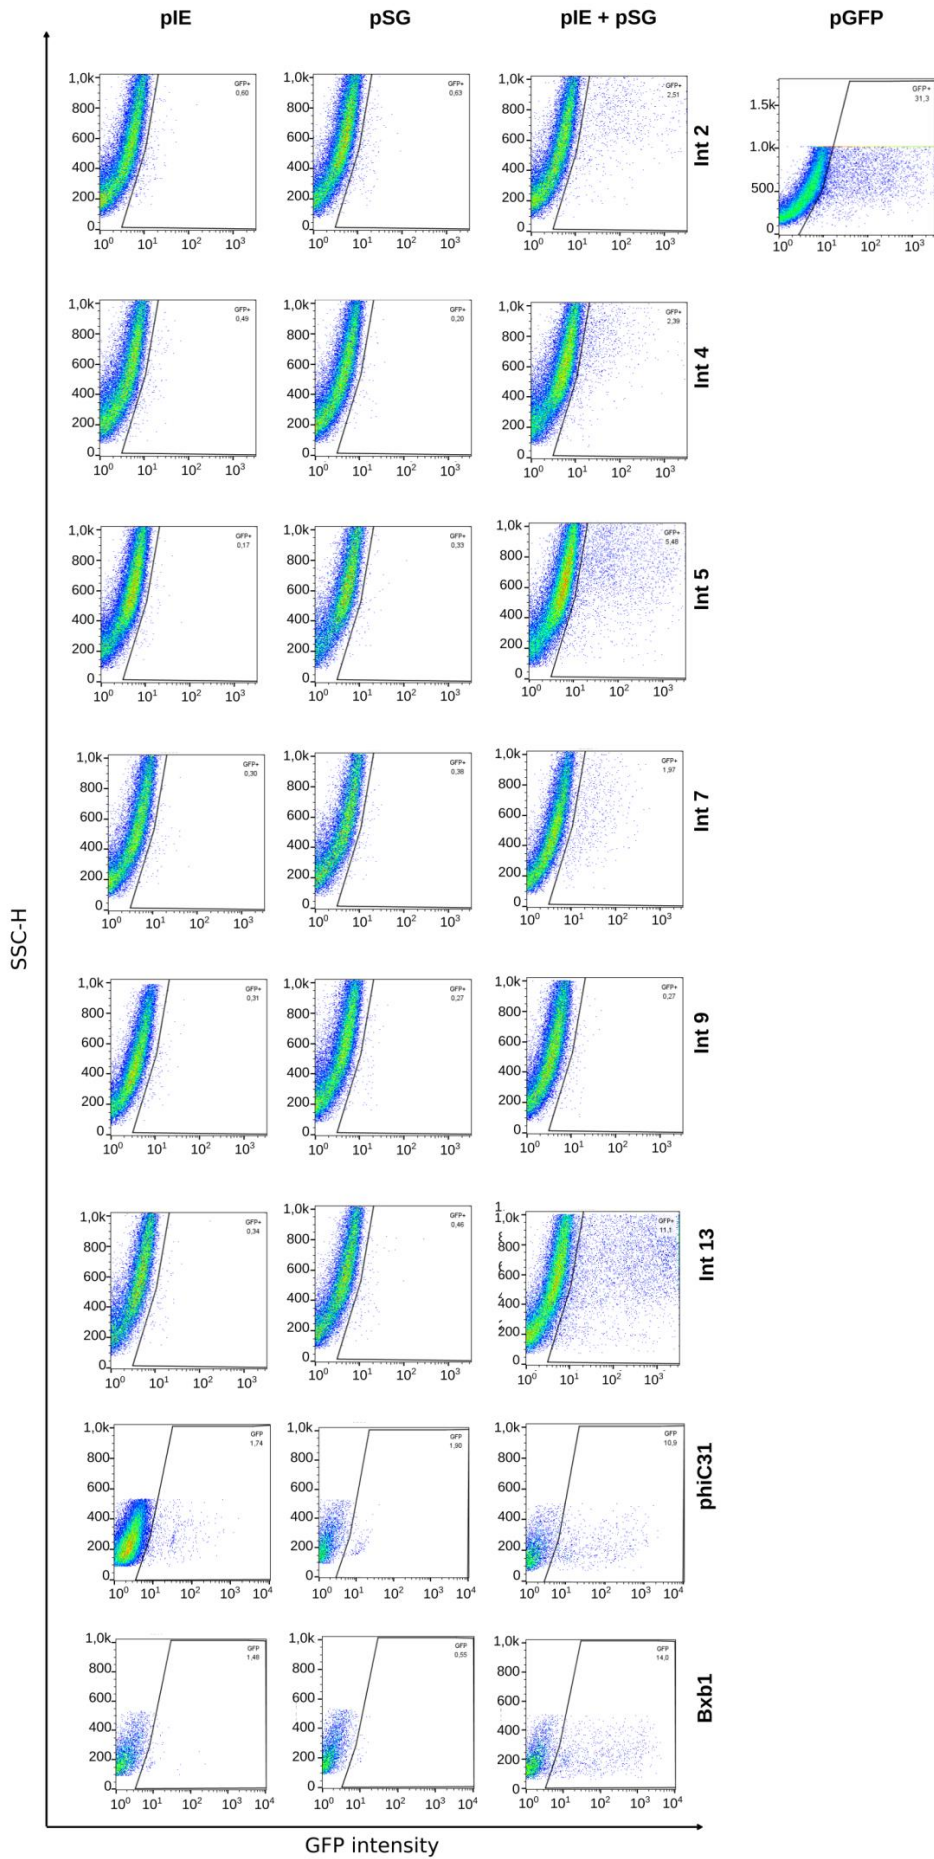

**Supplementary Figure 4.** EGFP fluorescence determined by flow cytometry analysis of HEK 293T cells. Representative scatter plots are shown indicating the EGFP fluorescence-emitting population in the gate. Experimental groups were analyzed after 48 h. The integrase expression vectors (pIE) of the Ints 2, 4, 5, 7, 9, 13, phiC31, and Bxb1 or the switch GFP vectors (pSG) containing the *egfp* gene in reverse complement orientation flanked by *attB/attP* sites of the Ints 2, 4, 5, 7, 9, 13, phiC31, and Bxb1 indicate negative controls. pIE + pSG indicates the cells cotransfected with integrase expression and switch GFP vectors (test condition). Positive control cells were transfected with the pT3-Neo-EF1 $\alpha$ -GFP plasmid containing the *egfp* sequence in the forward orientation (pGFP).

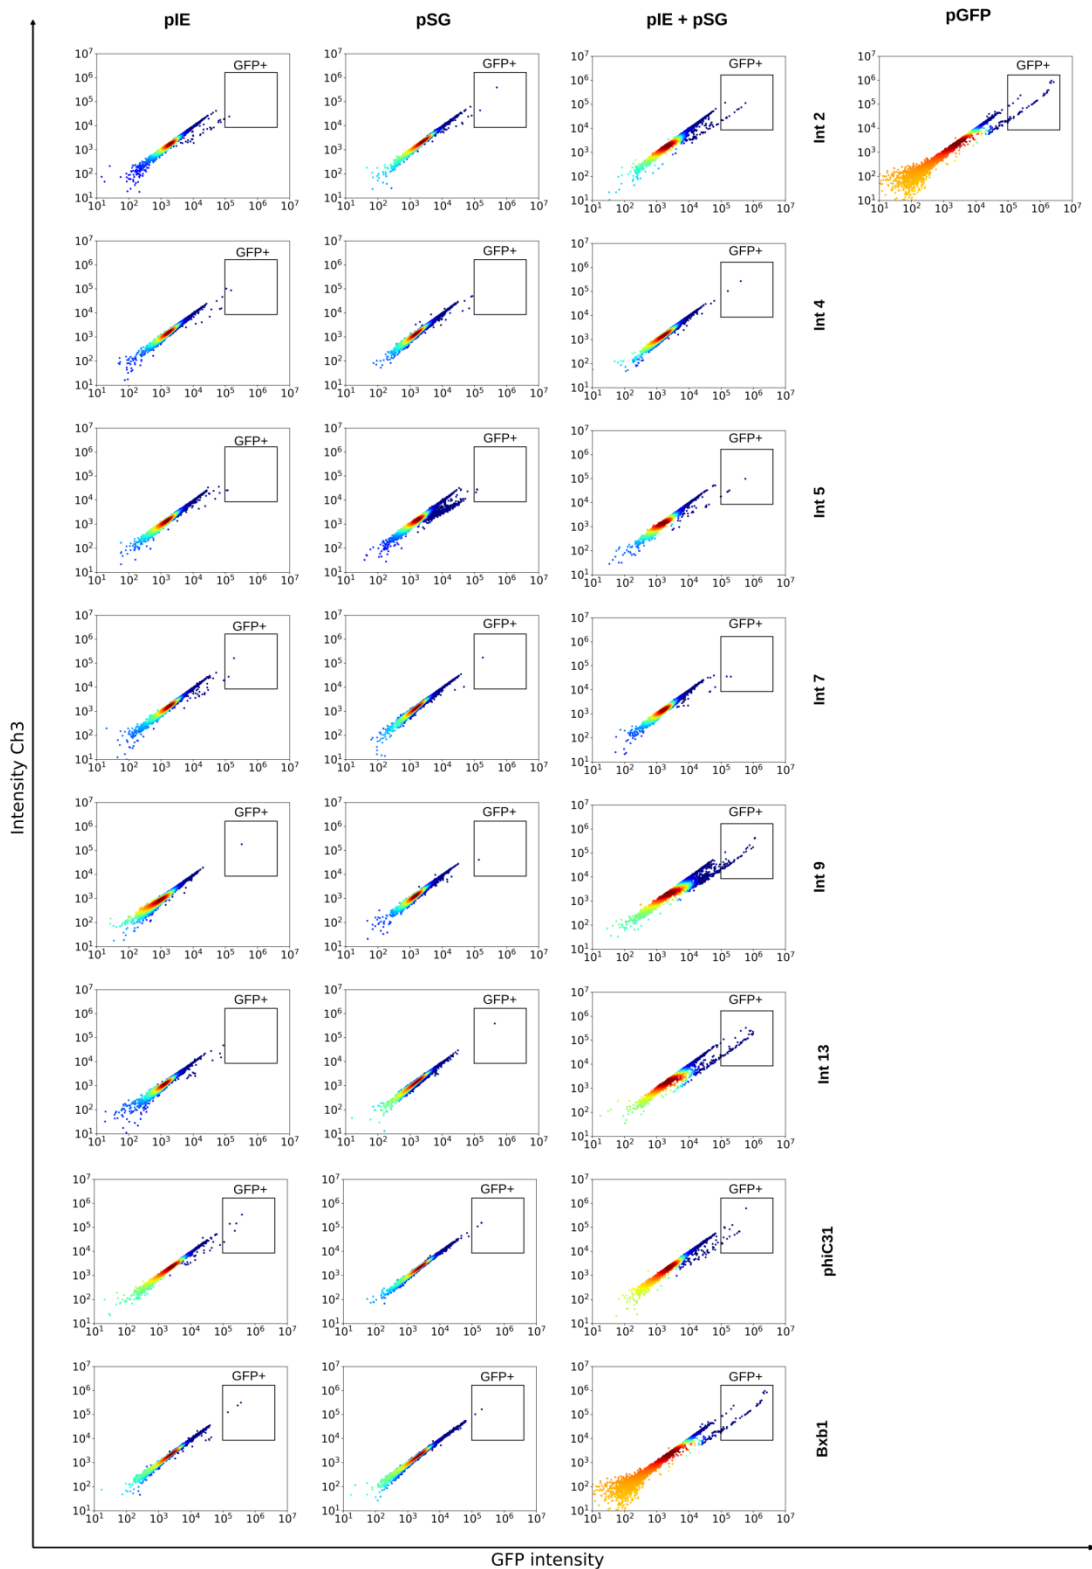

**Supplementary Figure 5.** EGFP fluorescence determined by flow cytometry analysis of bovine fibroblasts. Representative scatter plots are shown indicating the EGFP fluorescence-emitting population in the gate. Experimental groups were analyzed after 48 h. Negative control cells were cotransfected with one of the plasmids from the integrase expression vectors (pIE) of the Ints 2, 4, 5, 7, 9, 13, phiC31, and Bxb1 or one of the switch GFP vectors (pSG) containing the *egfp* gene in reverse complement

orientation flanked by *attB/attP* sites of the Ints 2, 4, 5, 7, 9, 13, phiC31, and Bxb1 plus a mock plasmid. pIE + pSG indicates the cells cotransfected with integrase expression and switch GFP vectors (test condition). Positive control cells were cotransfected with the pEF-GFP plasmid containing the *egfp* sequence in the forward orientation (pGFP) plus a mock plasmid.



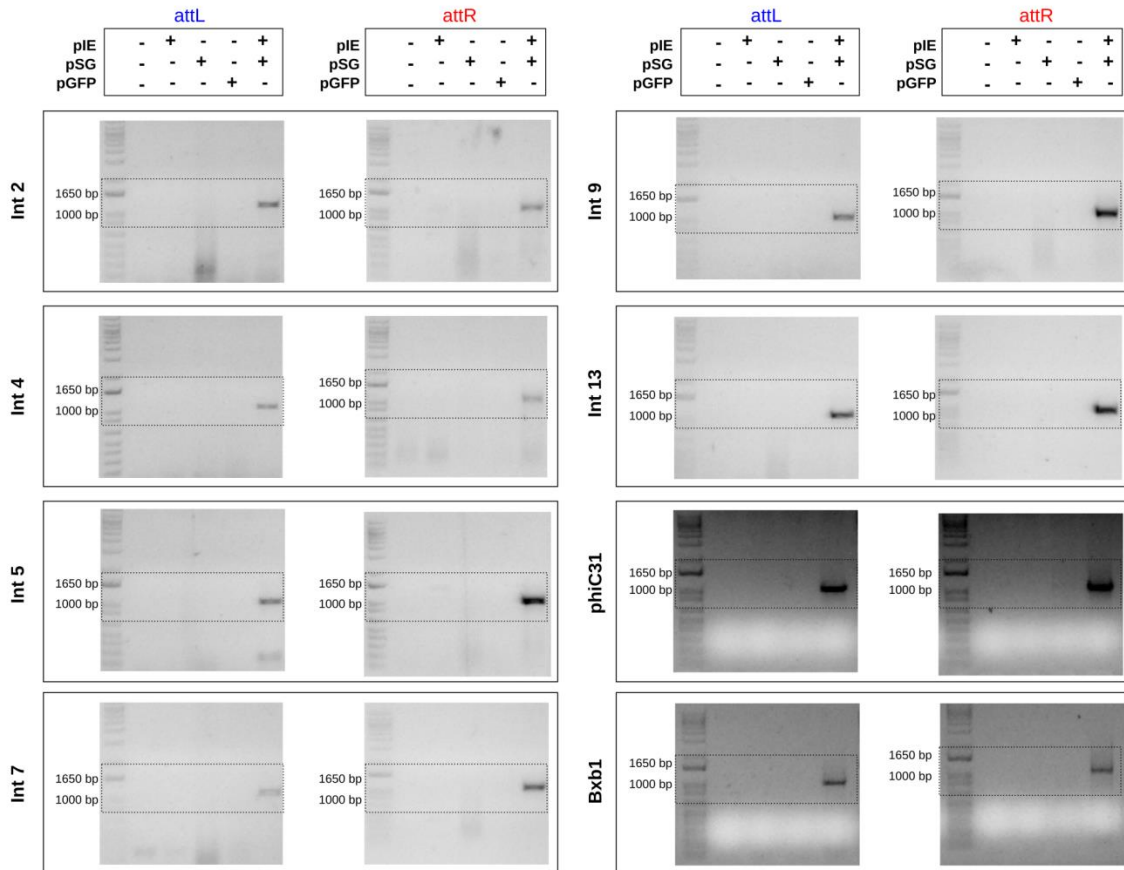

**Supplementary Figure 6.** HEK 293T cells uncropped PCR gel images. Amplicons obtained using two specific primer sets to verify *attL* (blue) and *attR* (red) formation after *egfp* flipping as shown in the main text Fig. 2c.

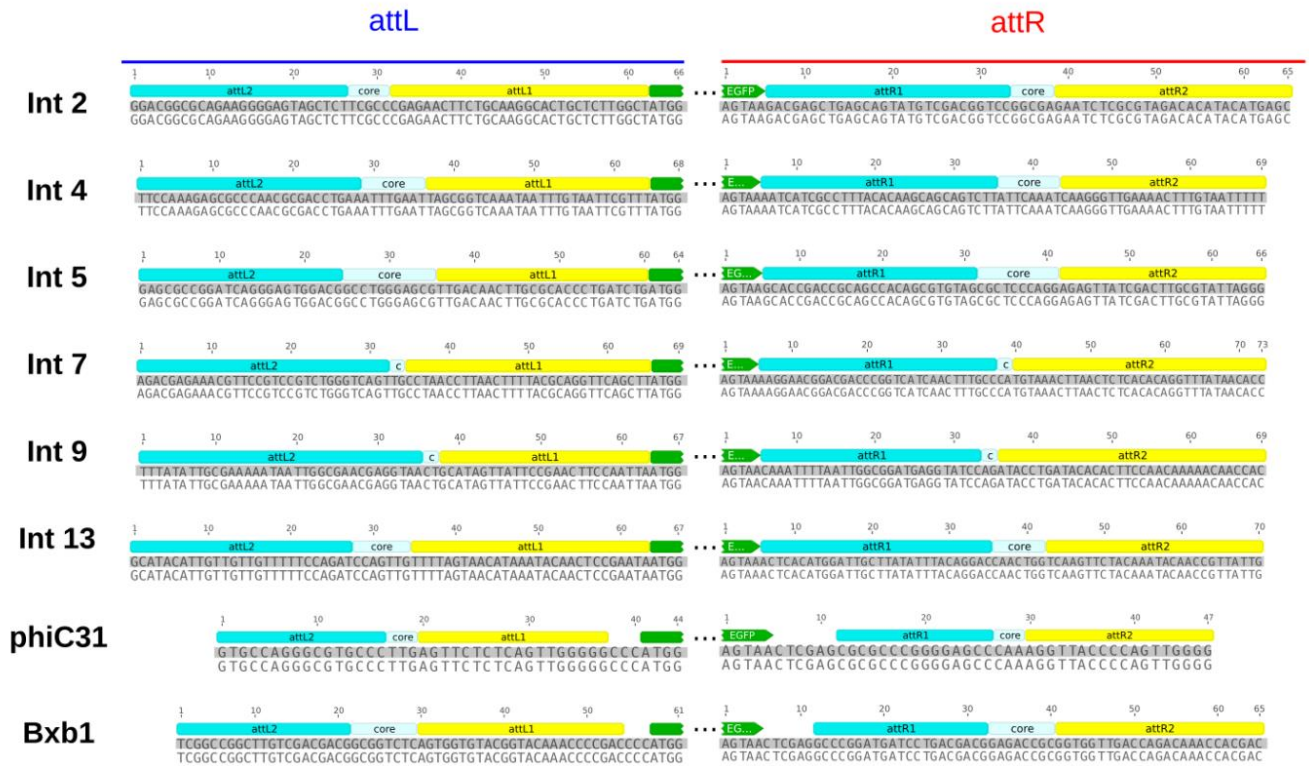

**Supplementary Figure 7.** Representative sequence reads showing the *attL* and *attR* sites obtained after Int activity in HEK 293T cells compared to the predicted sequences (grey highlighted). *attL1* and *attR1* correspond to the flipped *attP* and *attB* parts, respectively. *attL2* and *attR2* correspond to the previous *attB* and *attP* parts, respectively. Additional information in Supplementary Table 3 and Supplementary Data 1.

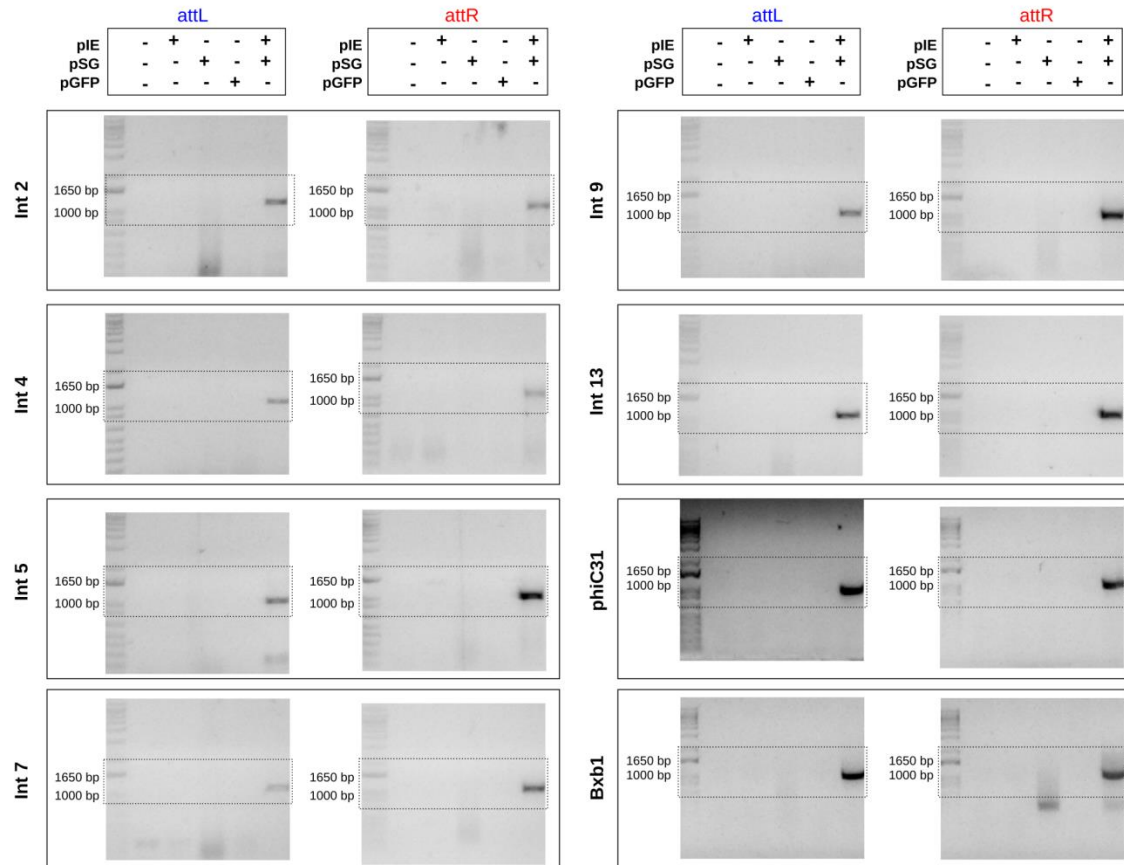

**Supplementary Figure 8.** Bovine fibroblasts uncropped PCR gel images. Amplicons obtained using two specific primer sets to verify *attL* (blue) and *attR* (red) formation after *egfp* flipping as shown in the main text Fig. 3c.

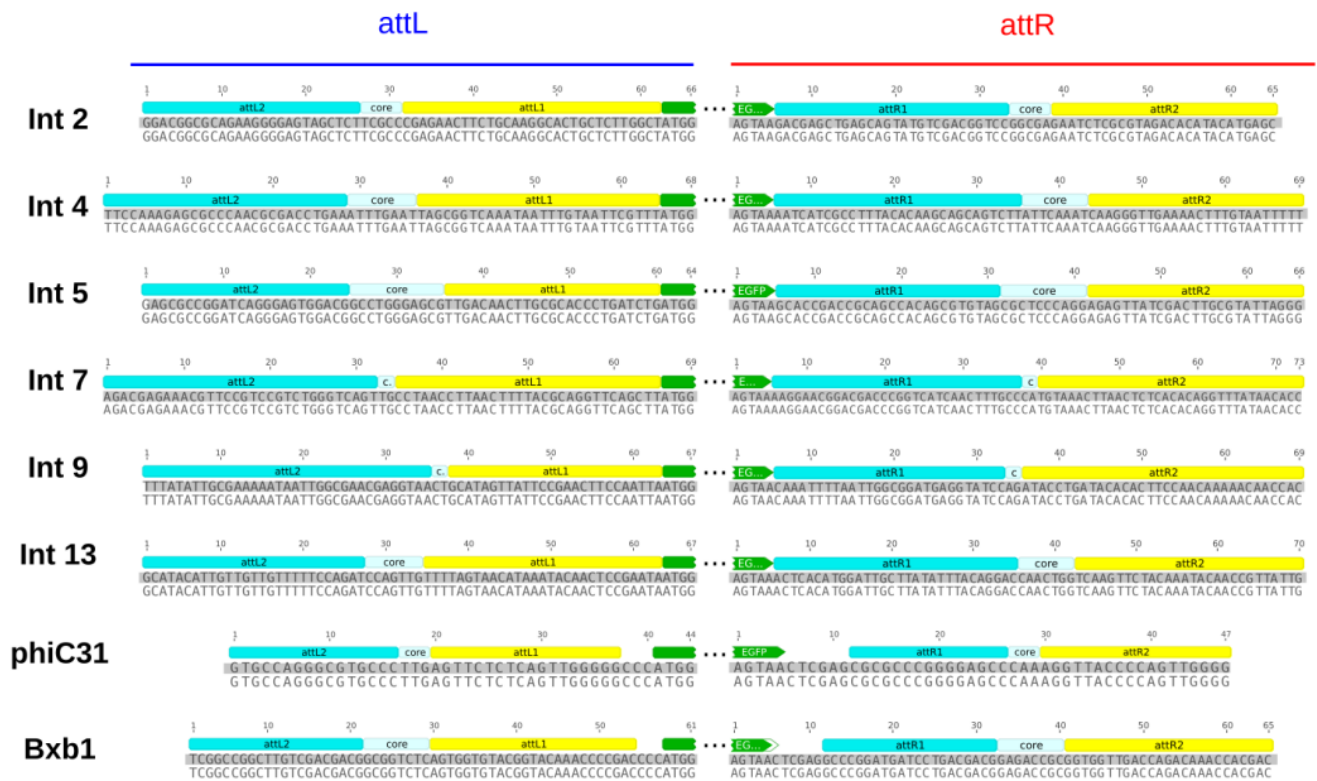

**Supplementary Figure 9.** Representative sequence reads showing the *attL* and *attR* sites obtained after Int activity in bovine fibroblasts compared to the predicted sequences (grey highlighted). *attL1* and *attR1* correspond to the flipped *attP* and *attB* parts, respectively. *attL2* and *attR2* correspond to the previous *attB* and *attP* parts, respectively. Additional information in Supplementary Table 3 and Supplementary Data 2.

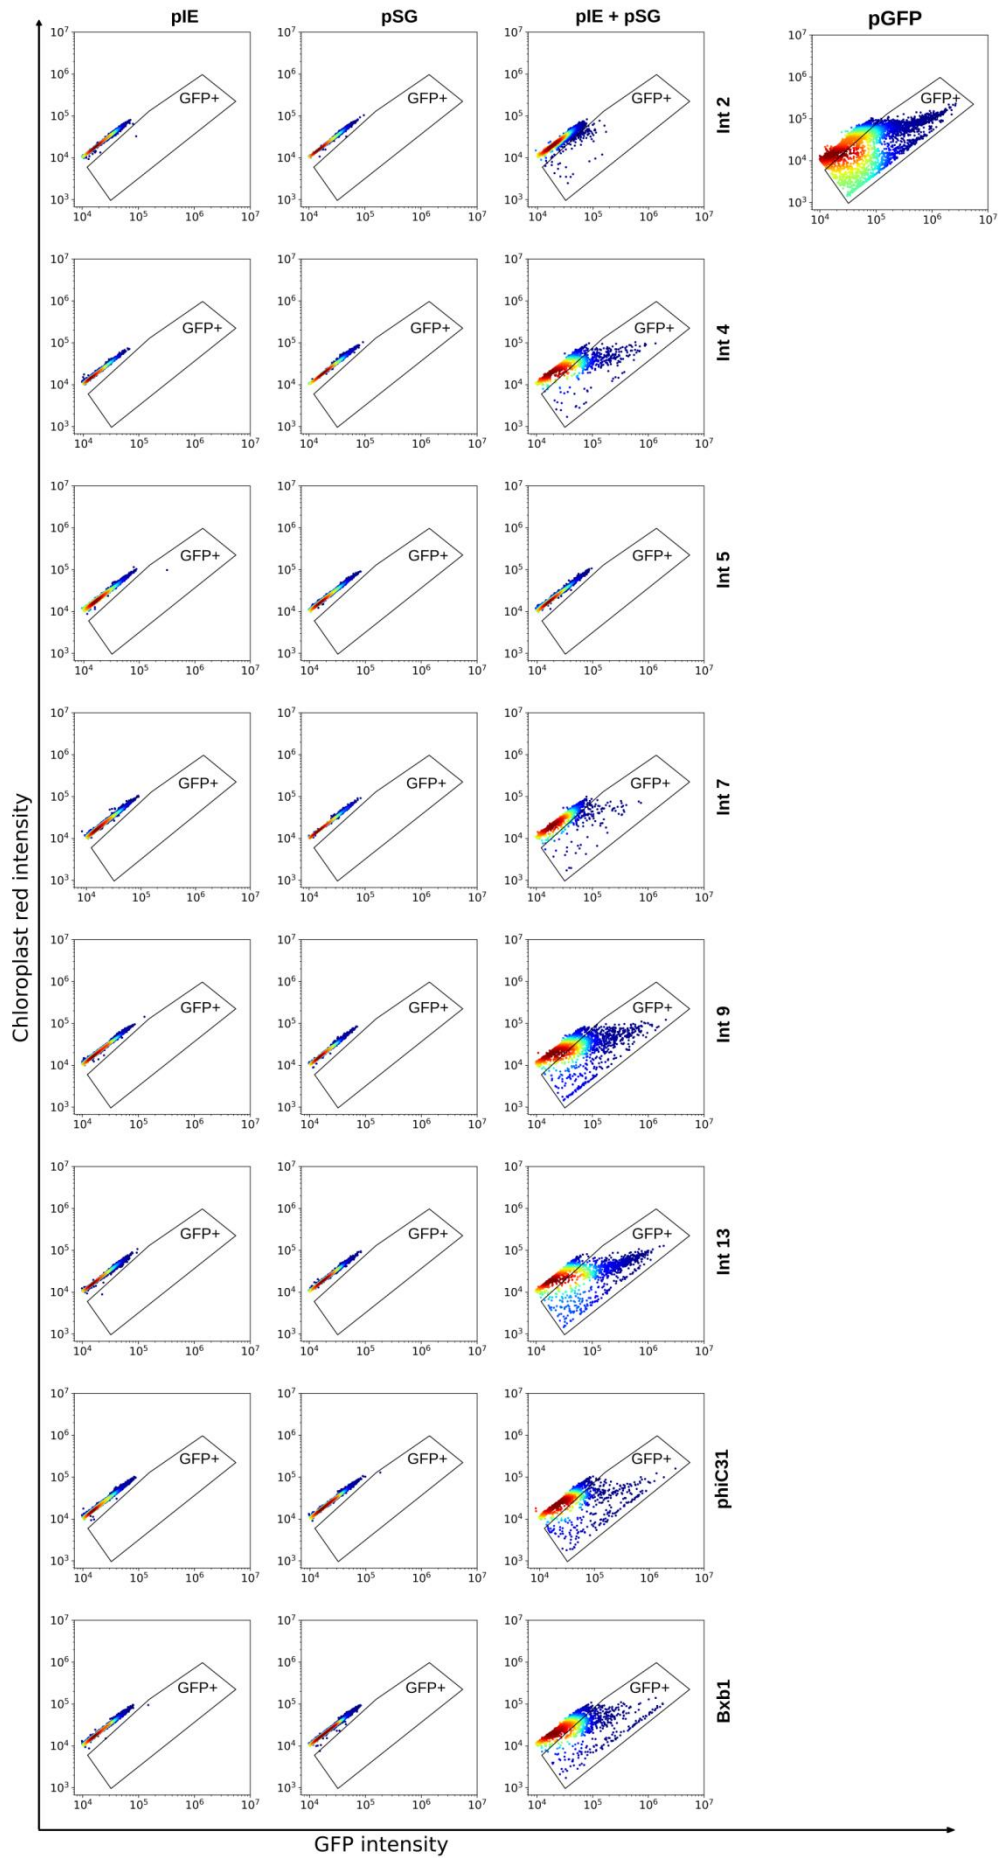

**Supplementary Figure 10.** EGFP fluorescence determined by flow cytometry analysis of *A. thaliana* protoplasts. Representative scatter plots are shown indicating the EGFP fluorescence-emitting population in the gate. Experimental groups were analyzed after 24 h. Negative control cells were cotransformed with one of the plasmids from the integrase expression vectors (pIE) of the Lnts 2, 4, 5, 7, 9, 13, phiC31, and Bxb1 or the switch GFP vectors (pSG) containing the *egfp* gene in reverse complement orientation flanked by *attB/attP* sites of the Lnts 2, 4, 5, 7, 9, 13, phiC31, and Bxb1 plus a mock plasmid. pIE+ pSG indicates the cells cotransformed with integrase expression and switch GFP vectors (test condition). Positive control cells were cotransformed with the pCaMV35S-GFP plasmid containing the *egfp* sequence in the forward orientation (pGFP) plus a mock plasmid.

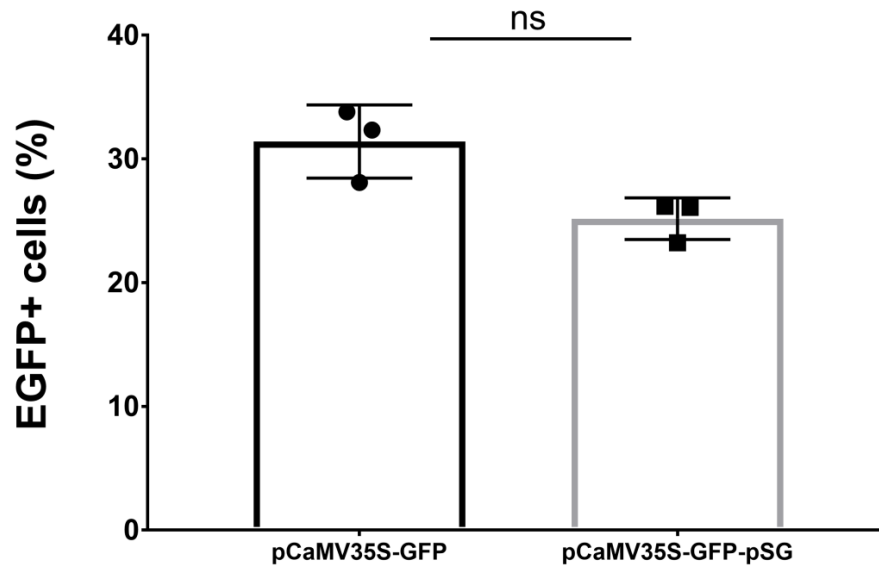

**Supplementary Figure 11.** EGFP-expressing cell percentages of the positive control pCaMV35S-GFP vector and pCaMV35S-GFP-pSG vector. pCaMV35S-GFP (pGFP) has a CaMV 35S promoter with some SNPs compared with the CaMV 35S promoter used in the switch GFP vectors (pSG). Then, the CaMV 35S promoter from pSG was cloned, replacing the pCaMV35S-GFP promoter, resulting in the pCaMV35S-GFP-pSG plasmid. Protoplasts were transformed with both plasmids separately, and flow cytometry analysis showed that the percentage of EGFP-expressing cell populations obtained with the two constructs did not result in statistically significant differences. The statistical analysis was performed in GraphPad Prism 7, applying a paired T test. p value=0.1277. Assays were performed in five or six technical replicates and in three biologically independent experiments.

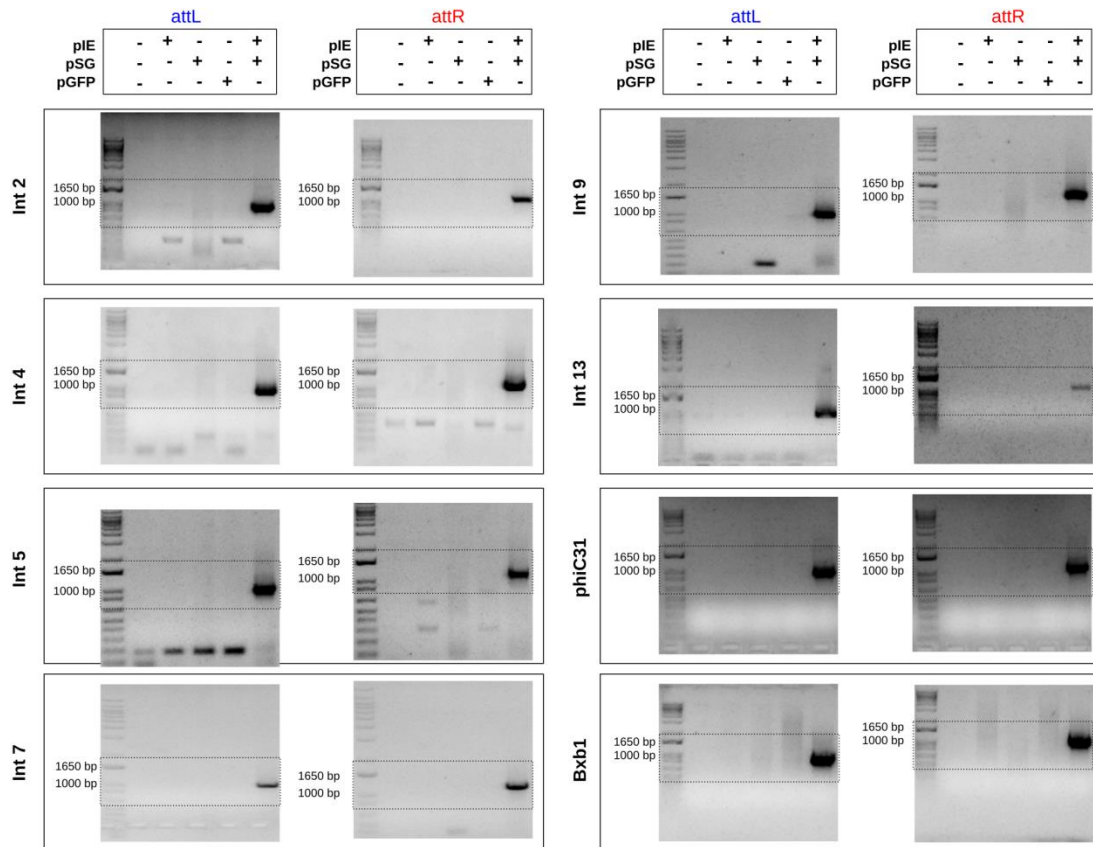

**Supplementary Figure 12.** *A. thaliana* protoplasts uncropped PCR gel images. Amplicons obtained using two specific primer sets to verify *attL* (blue) and *attR* (red) formation after *egfp* flipping as shown in the main text Fig. 4c.



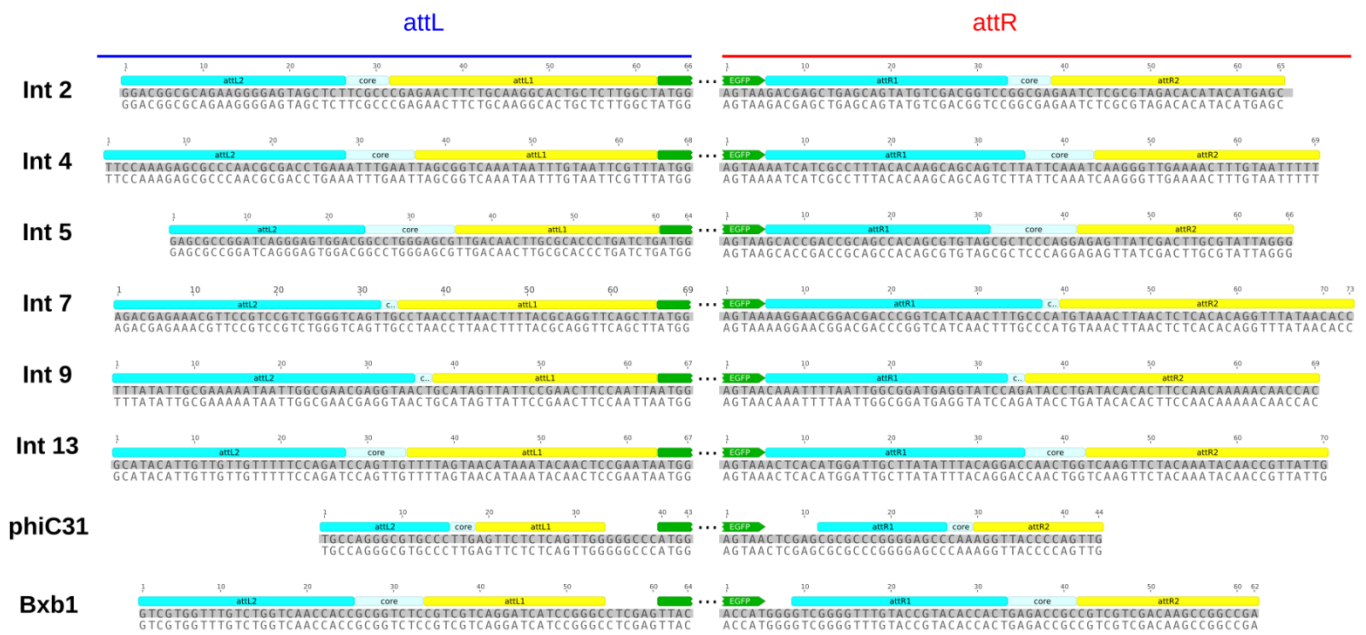

**Supplementary Figure 13.** Representative sequence reads showing the *attL* and *attR* sites obtained after Int activity in *A. thaliana* protoplasts compared to the predicted sequences (grey highlighted). *attL1* and *attR1* correspond to the flipped *attP* and *attB* parts, respectively. *attL2* and *attR2* correspond to the previous *attB* and *attP* parts, respectively. Additional information in Supplementary Table 3 and Supplementary Data 3.

### Original described

```

attB TTTATATTGCGAAAAATAATTGGCGAACAGGTAACTGGATACCTCATCCGCCAATTAAATTTG ... .. TAATTGGAAGTTCGGAAATAACTATGCAGATACCTGATACACACTTCCAACAAAAACAACCAC attP
AAATATAACGCTTTTATTAACCGCTTGGTCCATTGACCTATGGAGTAGGCGGTTAATTTTAAAC ... .. ATTAACCTCAAGCCTTATTGATACGCTATGGAATATGTGTGAAGGTTGTTTTGTGGTG
attL TTTATATTGCGAAAAATAATTGGCGAACAGGTACTGCATAGTTATTCCGAACTTCCAATTA ... .. CAAATTTAATTGGCGGATGAGGTATCCAGTACCTGATACACACTTCCAACAAAAACAACCAC attR
AAATATAACGCTTTTATTAACCGCTTGCTCCATGACGTATCAATAAGGCTTGAAGGTTAAT ... .. GTTTAAATTAACCGCCTACTCCATAGGCTATGGAATATGTGTGAAGGTTGTTTTGTGGTG
                                core                                core
  
```

### Identified after sequencing

```

attB TTTATATTGCGAAAAATAATTGGCGAACAGGTACTGGATACCTCATCCGCCAATTAAATTTG ... .. TAATTGGAAGTTCGGAAATAACTATGCAGATACCTGATACACACTTCCAACAAAAACAACCAC attP
AAATATAACGCTTTTATTAACCGCTTGGTCCATTGACCTATGGAGTAGGCGGTTAATTTTAAAC ... .. ATTAACCTCAAGCCTTATTGATACGCTATGGAATATGTGTGAAGGTTGTTTTGTGGTG
attL TTTATATTGCGAAAAATAATTGGCGAACAGGTACTGCATAGTTATTCCGAACTTCCAATTA ... .. CAAATTTAATTGGCGGATGAGGTATCCAGTACCTGATACACACTTCCAACAAAAACAACCAC attR
AAATATAACGCTTTTATTAACCGCTTGCTCCATGACGTATCAATAAGGCTTGAAGGTTAAT ... .. GTTTAAATTAACCGCCTACTCCATAGGCTATGGAATATGTGTGAAGGTTGTTTTGTGGTG
                                core                                core
  
```

### possible core-site dinucleotide identified

```

attB TTTATATTGCGAAAAATAATTGGCGAACGAGGTAACTGGATACCTCATCCGCCAATTAAATTTG ... .. TAATTGGAAGTTCGGAAATAACTATGCAGATACCTGATACACACTTCCAACAAAAACAACCAC attP
AAATATAACGCTTTTATTAACCGCTTGGTCCATTGACCTATGGAGTAGGCGGTTAATTTTAAAC ... .. ATTAACCTCAAGCCTTATTGATACGCTATGGAATATGTGTGAAGGTTGTTTTGTGGTG
attL TTTATATTGCGAAAAATAATTGGCGAACGAGGTAACTGCATAGTTATTCCGAACTTCCAATTA ... .. CAAATTTAATTGGCGGATGAGGTATCCAGTACCTGATACACACTTCCAACAAAAACAACCAC attR
AAATATAACGCTTTTATTAACCGCTTGCTCCATGACGTATCAATAAGGCTTGAAGGTTAAT ... .. GTTTAAATTAACCGCCTACTCCATAGGCTATGGAATATGTGTGAAGGTTGTTTTGTGGTG
                                core                                core
  
```

**Supplementary Figure 14.** Int 9 core-site differences compared to the original sequences described<sup>1</sup>. The Int 9 sequence alignments indicated one additional nucleotide near to core-site (black arrow top). Considering the integrase functional mechanism that leads to a rotational and religation of half part of the recognition *attB/P* sites forming the *attL/attR* sites (green and red parts), a possible solution was to consider CT nucleotide as Int9 core-site.

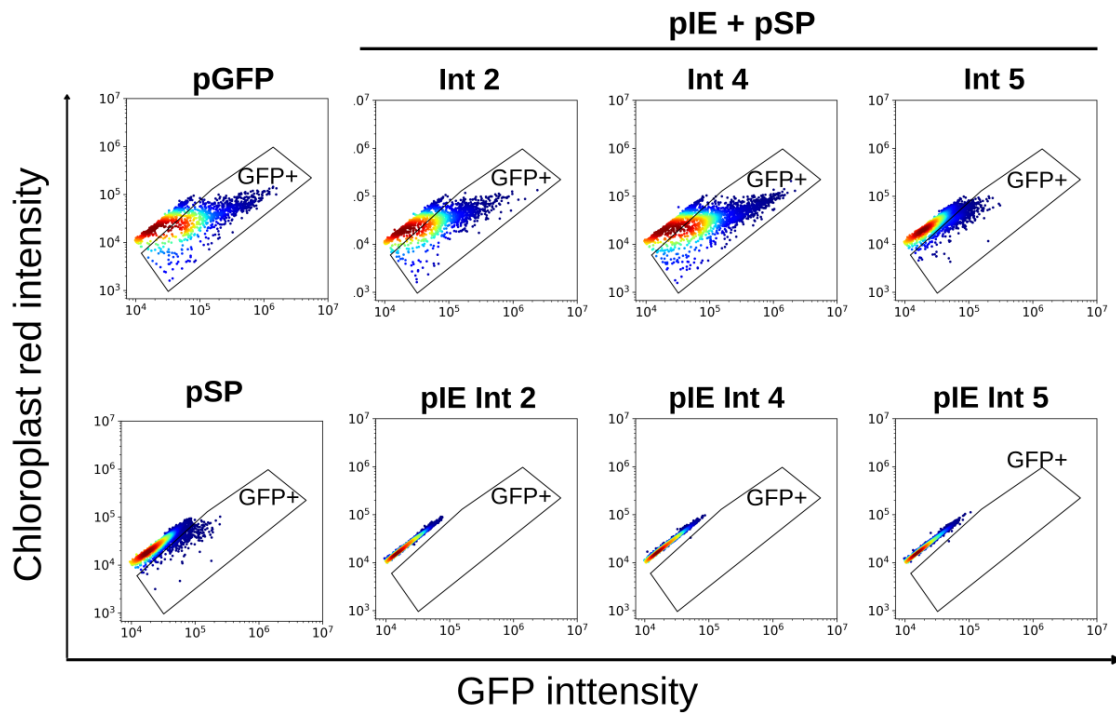

**Supplementary Figure 15.** EGFP fluorescence determined by flow cytometry analysis of *A. thaliana* protoplasts with the switch promoter system. Representative scatter plots are shown indicating the EGFP fluorescence-emitting population in the gate. Experimental groups were analyzed after 24 h. Negative control cells were cotransformed with one of the plasmids from the integrase expression vectors (pIE) of Ints 2, 4 and 5 or with the switch Promoter vector (pSP) containing the CaMV 35S promoter in reverse complement orientation flanked by *attB/attP* sites of Ints 2, 4 and 5 in tandem plus a mock plasmid. pIE+ pSP indicates the cells cotransformed with integrase expression vectors and the switch promoter vector (test condition). Positive control cells were cotransformed with the pCaMV35S-GFP plasmid containing the CaMV 35S promoter in the forward orientation (pGFP) plus a mock plasmid.

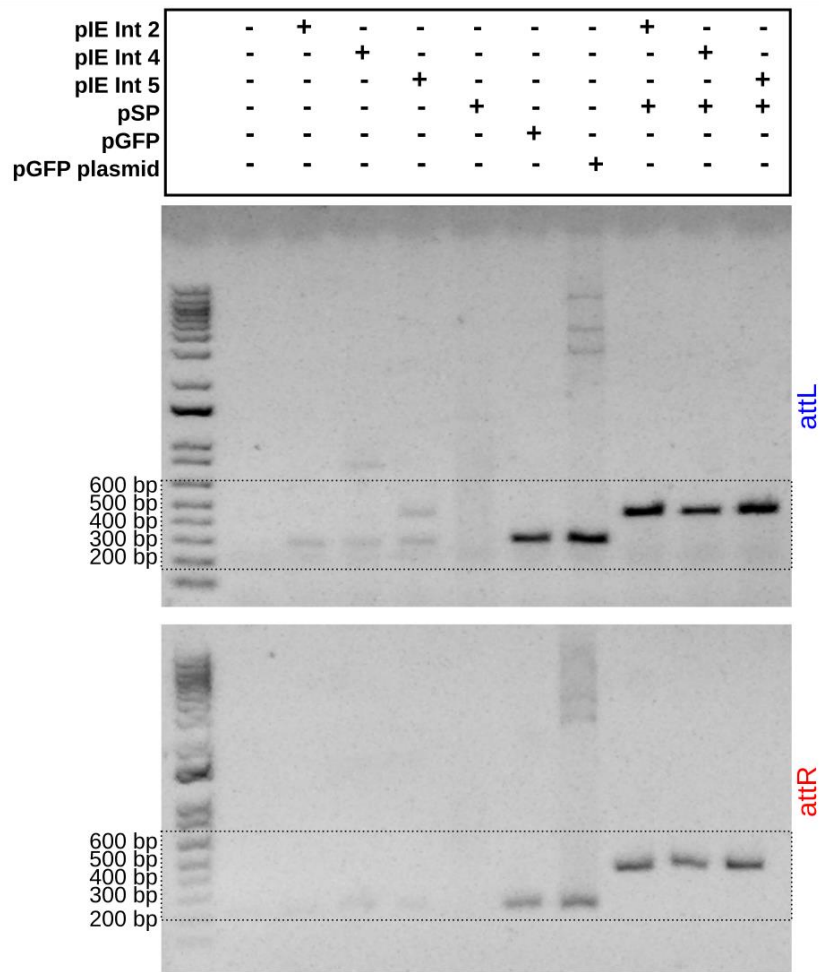

**Supplementary Figure 16.** *A. thaliana* protoplasts uncropped PCR gel images. Amplicons obtained using two specific primer sets to verify *attL* (blue) and *attR* (red) formation after CaMV 35S promoter flipping as shown in the main text Fig. 5d.

**a**

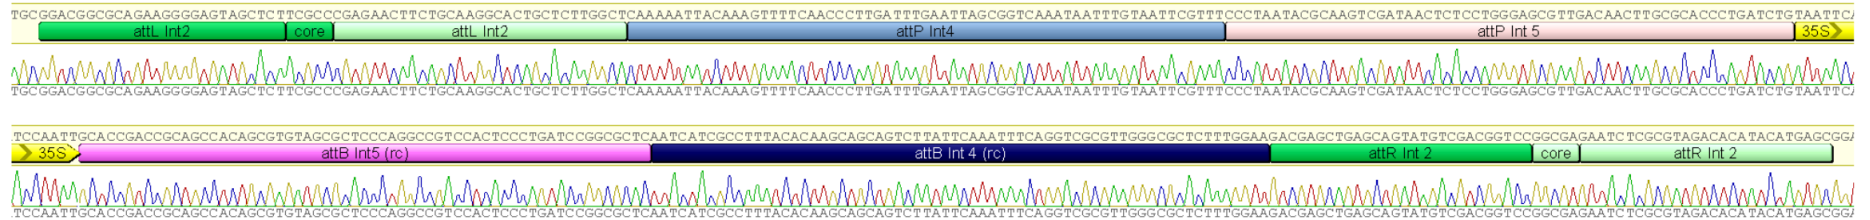

**b**

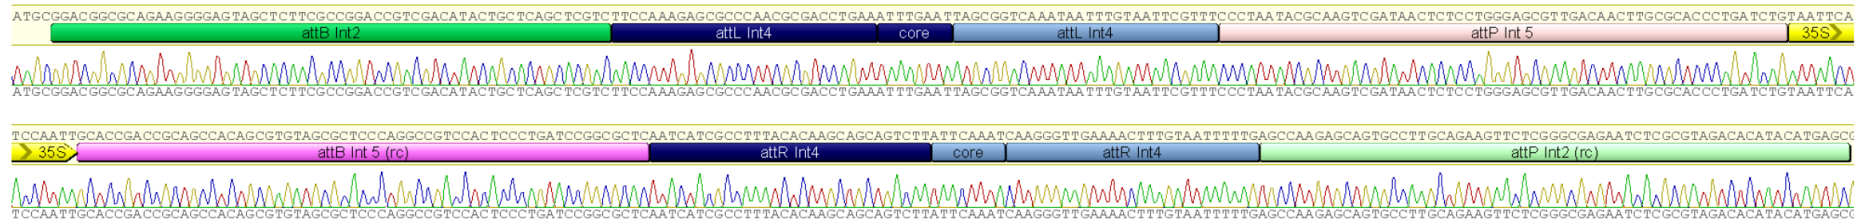

**c**

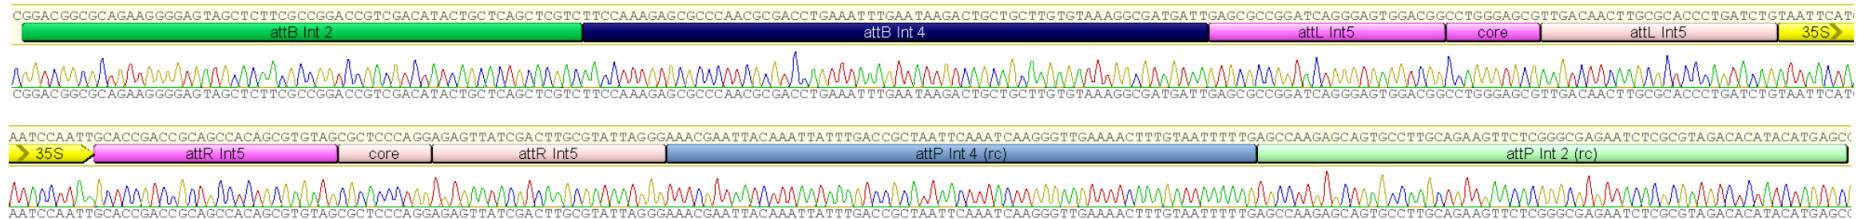

**Supplementary Figure 17.** Representative chromatograms showing the recognition site sequences obtained after Int activity in the switch promoter vector (pSP). **a** Recognition sites after Int 2 activity, resulting in *attL/attR* Int 2 sites and *attB/attP* Ints 4 and 5 sites in the expected positions. **b** Recognition sites after Int 4 activity, resulting in *attL/attR* Int 4 sites and *attB/attP* Ints 2 and 5 sites in the expected positions. **c** Recognition sites after Int 5 activity, resulting in *attL/attR* Int 5 sites and *attB/attP* Ints 2 and 4 sites in the expected positions. The core represents the region where cleavage occurred (crossover site). Additional information is provided in Supplementary Data 4.

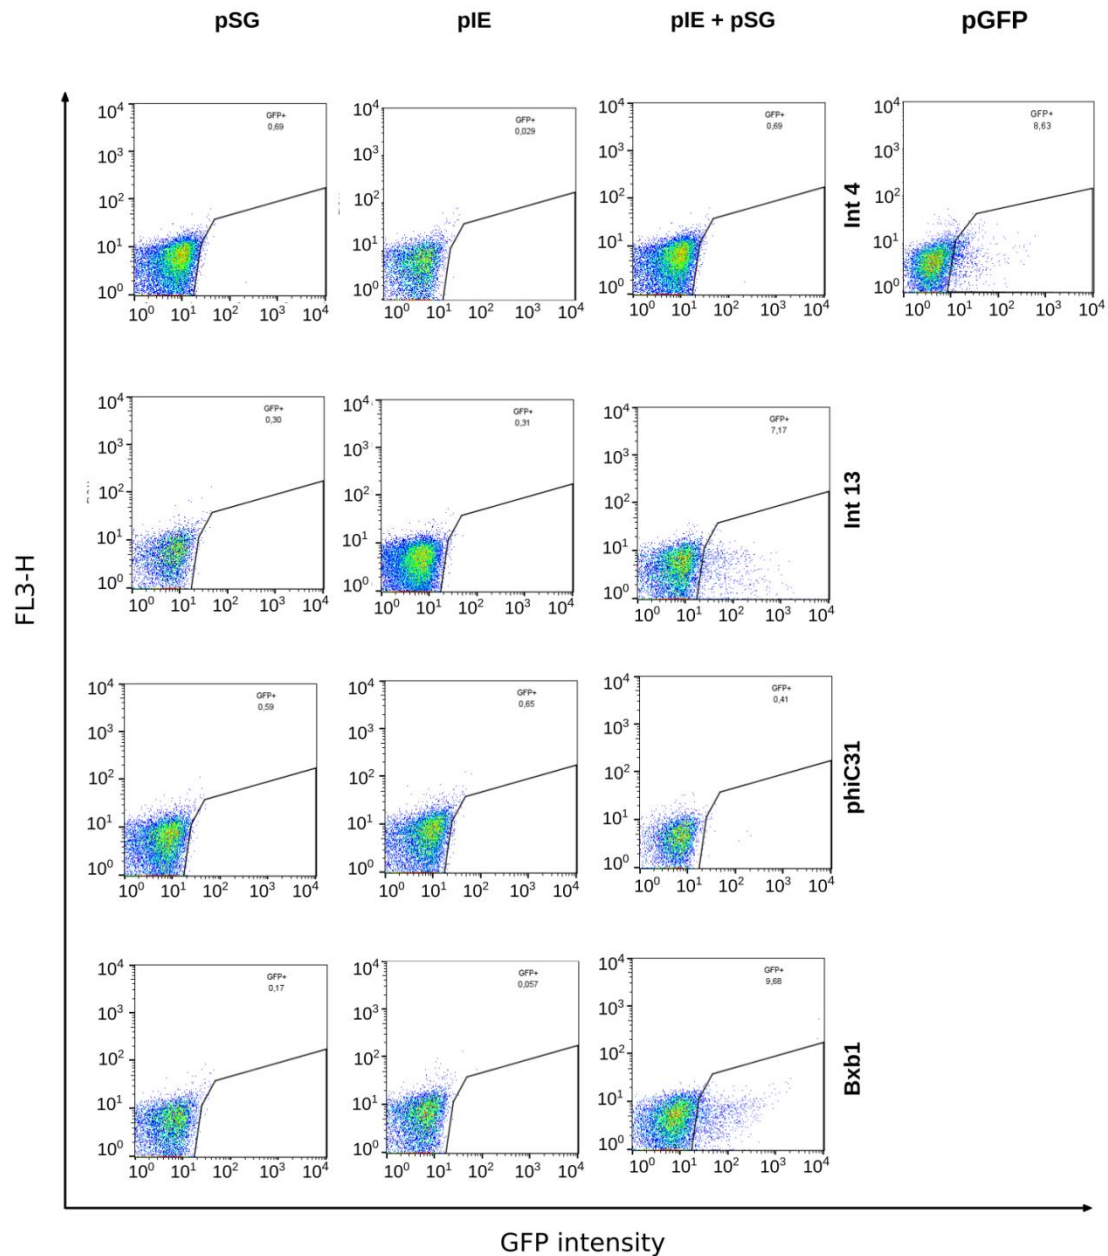

**Supplementary Figure 18.** EGFP fluorescence determined by flow cytometry analysis of PBMCs. Representative scatter plots are shown, indicating the EGFP fluorescence-emitting population in the gate. Experimental groups were analyzed after 48 h. Cells electroporated with the integrase expression vectors (pIE) of the Ints 4, 13, phiC31 and Bxb1 or the switch GFP vectors (pSG) containing the *egfp* sequence in reverse complement orientation flanked by *attB/attP* sites of the Ints 4, 13, phiC31, and Bxb1 indicate negative controls. pIE + pSG indicates the cells coelectroporated with integrase expression and switch GFP vectors (test condition). Positive control cells were transfected with the pT3-Neo-EF1 $\alpha$ -GFP plasmid containing the *egfp* sequence in the forward orientation (pGFP).

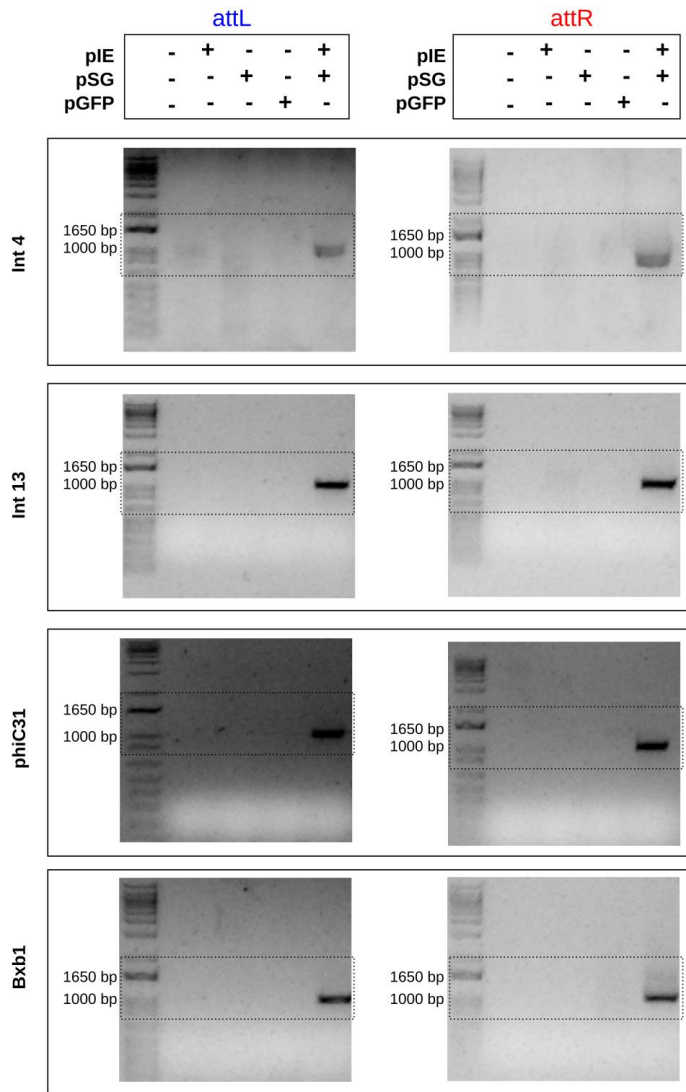

**Supplementary Figure 19.** PBMCs uncropped PCR gel images. Amplicons obtained using two specific primer sets to verify *attL* (blue) and *attR* (red) formation after *egfp* flipping as shown in the main text Fig. 6c.

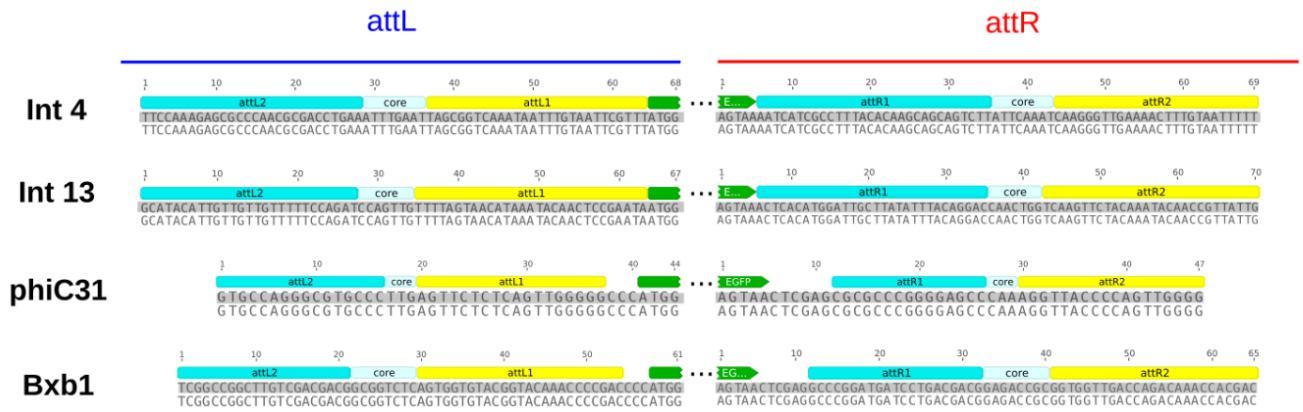

**Supplementary Figure 20.** Representative sequence reads showing the *attL* and *attR* sites obtained after Int activity in PBMCs compared to the predicted sequences (grey highlighted). *attL1* and *attR1* correspond to the flipped *attP* and *attB* parts, respectively. *attL2* and *attR2* correspond to the previous *attB* and *attP* parts, respectively. Additional information in Supplementary Table 6 and Supplementary Data 5.



**Supplementary Table 1. Addgene accession numbers of all plasmids used in this study.**

| Vector set | Plasmid name                  | Addgene accession number |
|------------|-------------------------------|--------------------------|
| pSG        | INCTbiosyn-pEF-GFP(rc)2       | #127504                  |
|            | INCTbiosyn-pEF-GFP(rc)4       | #127505                  |
|            | INCTbiosyn-pEF-GFP(rc)5       | #127506                  |
|            | INCTbiosyn-pEF-GFP(rc)7       | #127507                  |
|            | INCTbiosyn-pEF-GFP(rc)9       | #127508                  |
|            | INCTbiosyn-pEF-GFP(rc)13      | #127509                  |
|            | INCTbiosyn-pEF-GFP(rc)phiC31  | #127510                  |
|            | INCTbiosyn-pEF-GFP(rc)Bxb1    | #127511                  |
| pIE        | INCTbiosyn-pUB-HspINT2        | #127512                  |
|            | INCTbiosyn-pUB-HspINT4        | #127513                  |
|            | INCTbiosyn-pUB-HspINT5        | #127514                  |
|            | INCTbiosyn-pUB-HspINT7        | #127515                  |
|            | INCTbiosyn-pUB-HspINT9        | #127516                  |
|            | INCTbiosyn-pUB-HspINT13       | #127517                  |
|            | INCTbiosyn-pUB-HspINTphiC31   | #127518                  |
|            | INCTbiosyn-pUB-HspINTBxb1     | #127519                  |
| pSP        | INCTbiosyn-p35S(rc)2_4_5-GFP  | #127520                  |
| pSG        | INCTbiosyn-p35S-GFP(rc)2      | #127521                  |
|            | INCTbiosyn-p35S-GFP(rc)4      | #127522                  |
|            | INCTbiosyn-p35S-GFP(rc)5      | #127523                  |
|            | INCTbiosyn-p35S-GFP(rc)7      | #127524                  |
|            | INCTbiosyn-p35S-GFP(rc)9      | #127525                  |
|            | INCTbiosyn-p35S-GFP(rc)13     | #127526                  |
|            | INCTbiosyn-p35S-GFP(rc)phiC31 | #127527                  |
|            | INCTbiosyn-p35S-GFP(rc)Bxb1   | #127528                  |
| pIE        | INCTbiosyn-pAct-AtlINT2       | #127529                  |
|            | INCTbiosyn-pAct-AtlINT4       | #127530                  |
|            | INCTbiosyn-pAct-AtlINT5       | #127531                  |
|            | INCTbiosyn-pAct-AtlINT7       | #127532                  |
|            | INCTbiosyn-pAct-AtlINT9       | #127533                  |
|            | INCTbiosyn-pAct-AtlINT13      | #127534                  |
|            | INCTbiosyn-pAct-AtlINTphiC31  | #127535                  |
|            | INCTbiosyn-pAct-AtlINTBxb1    | #127536                  |

**Supplementary Table 2. Summary of the statistical analysis of the EGFP-positive cell percentages obtained by flow cytometry assays with the switch GFP system in HEK 293T cells, bovine fibroblasts and plant protoplasts.**

|                   | Cell type         | Int    | Mean $\pm$ sd                  |                               |                               |                              | Assays Repetition (n) | Kruskal-Wallis statistics ( $\chi^2$ ) | df | p-value                |
|-------------------|-------------------|--------|--------------------------------|-------------------------------|-------------------------------|------------------------------|-----------------------|----------------------------------------|----|------------------------|
|                   |                   |        | pGFP                           | pIE + pSG                     | pIE                           | pSG                          |                       |                                        |    |                        |
| Switch GFP system | HEK 293T          | Int 2  | 21.32 $\pm$ 11.84 <sup>a</sup> | 1.29 $\pm$ 1.09 <sup>b</sup>  | 2.93 $\pm$ 3.44 <sup>b</sup>  | 0.33 $\pm$ 0.22 <sup>c</sup> | 3                     | 20.30                                  | 3  | 0.00015                |
|                   |                   | Int 4  | 21.32 $\pm$ 11.84 <sup>a</sup> | 1.33 $\pm$ 1.27 <sup>b</sup>  | 0.36 $\pm$ 0.10 <sup>b</sup>  | 0.17 $\pm$ 0.08 <sup>c</sup> | 3                     | 24.94                                  | 3  | 1.59 $\times 10^{-5}$  |
|                   |                   | Int 5  | 21.32 $\pm$ 11.84 <sup>a</sup> | 2.52 $\pm$ 3.29 <sup>b</sup>  | 0.35 $\pm$ 0.19 <sup>b</sup>  | 0.30 $\pm$ 0.14 <sup>b</sup> | 3                     | 17.51                                  | 3  | 0.00055                |
|                   |                   | Int 7  | 21.32 $\pm$ 11.84 <sup>a</sup> | 0.93 $\pm$ 0.83 <sup>b</sup>  | 0.36 $\pm$ 0.18 <sup>b</sup>  | 0.47 $\pm$ 0.27 <sup>b</sup> | 3                     | 18.31                                  | 3  | 0.00038                |
|                   |                   | Int 9  | 21.32 $\pm$ 11.84 <sup>a</sup> | 0.48 $\pm$ 0.24 <sup>b</sup>  | 0.21 $\pm$ 0.08 <sup>c</sup>  | 0.58 $\pm$ 0.41 <sup>b</sup> | 3                     | 21.82                                  | 3  | 7.13 $\times 10^{-5}$  |
|                   |                   | Int 13 | 21.32 $\pm$ 11.84 <sup>a</sup> | 7.07 $\pm$ 5.31 <sup>b</sup>  | 0.44 $\pm$ 0.30 <sup>c</sup>  | 0.39 $\pm$ 0.32 <sup>c</sup> | 3                     | 24.79                                  | 3  | 1.71 $\times 10^{-5}$  |
|                   |                   | phiC31 | 21.32 $\pm$ 11.84 <sup>a</sup> | 10.79 $\pm$ 3.72 <sup>a</sup> | 2.36 $\pm$ 2.00 <sup>b</sup>  | 1.37 $\pm$ 1.22 <sup>b</sup> | 3                     | 20.96                                  | 3  | 0.00011                |
|                   |                   | Bxb1   | 21.32 $\pm$ 11.84 <sup>a</sup> | 16.02 $\pm$ 7.25 <sup>a</sup> | 1.82 $\pm$ 1.98 <sup>b</sup>  | 2.30 $\pm$ 2.74 <sup>b</sup> | 3                     | 20.29                                  | 3  | 0.00015                |
|                   | Bovine Fibroblast | Int 2  | 1.80 $\pm$ 0.49 <sup>a</sup>   | 0.12 $\pm$ 0.04 <sup>b</sup>  | 0.04 $\pm$ 0.03 <sup>c</sup>  | 0.02 $\pm$ 0.03 <sup>c</sup> | 3                     | 29.37                                  | 3  | 1.87 $\times 10^{-6}$  |
|                   |                   | Int 4  | 1.80 $\pm$ 0.49 <sup>a</sup>   | 0.03 $\pm$ 0.03 <sup>b</sup>  | 0.02 $\pm$ 0.02 <sup>bc</sup> | 0.01 $\pm$ 0.01 <sup>c</sup> | 3                     | 23.04                                  | 3  | 3.97 $\times 10^{-5}$  |
|                   |                   | Int 5  | 1.44 $\pm$ 0.79 <sup>a</sup>   | 0.04 $\pm$ 0.02 <sup>b</sup>  | 0.01 $\pm$ 0.01 <sup>c</sup>  | 0.02 $\pm$ 0.03 <sup>c</sup> | 3                     | 23.57                                  | 3  | 3.08 $\times 10^{-5}$  |
|                   |                   | Int 7  | 1.44 $\pm$ 0.79 <sup>a</sup>   | 0.03 $\pm$ 0.02 <sup>b</sup>  | 0.02 $\pm$ 0.02 <sup>b</sup>  | 0.02 $\pm$ 0.01 <sup>b</sup> | 3                     | 20.95                                  | 3  | 0.00011                |
|                   |                   | Int 9  | 4.51 $\pm$ 3.99 <sup>a</sup>   | 0.28 $\pm$ 0.12 <sup>b</sup>  | 0.02 $\pm$ 0.02 <sup>c</sup>  | 0.01 $\pm$ 0.01 <sup>c</sup> | 3                     | 30.46                                  | 3  | 1.10 $\times 10^{-6}$  |
|                   |                   | Int 13 | 4.51 $\pm$ 3.99 <sup>a</sup>   | 0.74 $\pm$ 0.57 <sup>b</sup>  | 0.02 $\pm$ 0.02 <sup>c</sup>  | 0.01 $\pm$ 0.01 <sup>c</sup> | 3                     | 29.19                                  | 3  | 2.04 $\times 10^{-6}$  |
|                   |                   | phiC31 | 1.34 $\pm$ 0.48 <sup>a</sup>   | 0.13 $\pm$ 0.03 <sup>b</sup>  | 0.04 $\pm$ 0.04 <sup>c</sup>  | 0.02 $\pm$ 0.01 <sup>d</sup> | 3                     | 29.68                                  | 3  | 1.61 $\times 10^{-6}$  |
|                   |                   | Bxb1   | 1.34 $\pm$ 0.48 <sup>a</sup>   | 0.33 $\pm$ 0.12 <sup>b</sup>  | 0.03 $\pm$ 0.02 <sup>c</sup>  | 0.01 $\pm$ 0.01 <sup>d</sup> | 3                     | 30.84                                  | 3  | 9.18 $\times 10^{-7}$  |
|                   | Protoplast        | Int 2  | 30.95 $\pm$ 8.79 <sup>a</sup>  | 2.71 $\pm$ 2.29 <sup>b</sup>  | 0.00 $\pm$ 0.01 <sup>d</sup>  | 0.02 $\pm$ 0.03 <sup>c</sup> | 5                     | 52.31                                  | 3  | 2.57 $\times 10^{-11}$ |
|                   |                   | Int 4  | 30.57 $\pm$ 4.31 <sup>a</sup>  | 17.77 $\pm$ 3.70 <sup>b</sup> | 0.00 $\pm$ 0.00 <sup>c</sup>  | 0.00 $\pm$ 0.00 <sup>c</sup> | 3                     | 33.76                                  | 3  | 2.22 $\times 10^{-7}$  |
|                   |                   | Int 5  | 23.08 $\pm$ 5.52 <sup>a</sup>  | 0.14 $\pm$ 0.13 <sup>b</sup>  | 0.00 $\pm$ 0.00 <sup>c</sup>  | 0.01 $\pm$ 0.02 <sup>c</sup> | 3                     | 28.96                                  | 3  | 2.28 $\times 10^{-6}$  |
|                   |                   | Int 7  | 27.91 $\pm$ 10.99 <sup>a</sup> | 10.96 $\pm$ 3.92 <sup>b</sup> | 0.01 $\pm$ 0.03 <sup>c</sup>  | 0.00 $\pm$ 0.00 <sup>c</sup> | 4                     | 43.01                                  | 3  | 2.45 $\times 10^{-9}$  |
|                   |                   | Int 9  | 28.44 $\pm$ 3.03 <sup>a</sup>  | 16.44 $\pm$ 7.59 <sup>b</sup> | 0.01 $\pm$ 0.02 <sup>c</sup>  | 0.00 $\pm$ 0.01 <sup>c</sup> | 3                     | 31.33                                  | 3  | 7.24 $\times 10^{-7}$  |
|                   |                   | Int 13 | 21.40 $\pm$ 9.12 <sup>a</sup>  | 24.24 $\pm$ 9.98 <sup>a</sup> | 0.01 $\pm$ 0.02 <sup>b</sup>  | 0.01 $\pm$ 0.02 <sup>b</sup> | 4                     | 38.70                                  | 3  | 2.01 $\times 10^{-8}$  |
|                   |                   | phiC31 | 25.84 $\pm$ 8.74 <sup>a</sup>  | 9.87 $\pm$ 3.14 <sup>b</sup>  | 0.01 $\pm$ 0.02 <sup>c</sup>  | 0.01 $\pm$ 0.02 <sup>c</sup> | 3                     | 30.15                                  | 3  | 1.28 $\times 10^{-6}$  |
|                   |                   | Bxb1   | 25.84 $\pm$ 8.74 <sup>a</sup>  | 10.47 $\pm$ 2.57 <sup>b</sup> | 0.04 $\pm$ 0.10 <sup>c</sup>  | 0.01 $\pm$ 0.02 <sup>c</sup> | 3                     | 30.53                                  | 3  | 1.07 $\times 10^{-6}$  |

Different letters indicate significant differences among the data in each line obtained by the Kruskal-Wallis test at the 5% statistical probability level.

**Supplementary Table 3. Number of PCR cloned sequences after Int activity on the switch GFP systems and observed covered mutations in HEK 293T, bovine fibroblast and plant protoplast cells.**

| Cell type         |                   | Sequence description            | Int2                 | Int 4  | Int 5                | Int 7                | Int 9                 | Int 13 | phiC31 | Bxb1                 |
|-------------------|-------------------|---------------------------------|----------------------|--------|----------------------|----------------------|-----------------------|--------|--------|----------------------|
| Switch GFP system | HEK 293T          | Total sequenced clones          | 7                    | 9      | 16                   | 16                   | 16                    | 17     | 10     | 9                    |
|                   |                   | Selected high quality sequences | 11                   | 16     | 31                   | 31                   | 31                    | 31     | 20     | 18                   |
|                   |                   | <i>attL</i> coverage mutations  | 0                    | 0      | 0                    | 0                    | 0                     | 0      | 0      | 0                    |
|                   |                   | <i>egfp</i> coverage mutations  | 2 SNPs               | 3 SNPs | 6 SNPs               | 4 SNPs               | 7 SNPs<br>2 deletions | 0      | 4 SNPs | 5 SNPs               |
|                   |                   | <i>attR</i> coverage mutations  | 0                    | 0      | 0                    | 0                    | 0                     | 0      | 0      | 0                    |
|                   | Bovine Fibroblast | Total sequenced clones          | 11                   | 18     | 19                   | 24                   | 16                    | 24     | 10     | 7                    |
|                   |                   | Selected high quality sequences | 16                   | 32     | 33                   | 48                   | 32                    | 44     | 20     | 14                   |
|                   |                   | <i>attL</i> coverage mutations  | 0                    | 0      | 0                    | 0                    | 0                     | 0      | 0      | 0                    |
|                   |                   | <i>egfp</i> coverage mutations  | 2 SNPs               | 5 SNPs | 5 SNPs<br>1 deletion | 4 SNPs<br>1 deletion | 3 SNPs                | 1 SNP  | 9 SNPs | 3 SNPs<br>1 deletion |
|                   |                   | <i>attR</i> coverage mutations  | 0                    | 1 SNP  | 0                    | 0                    | 0                     | 0      | 0      | 0                    |
|                   | Protoplast        | Total sequenced clones          | 29                   | 37     | 18                   | 36                   | 12                    | 40     | 23     | 15                   |
|                   |                   | Selected high quality sequences | 50                   | 66     | 32                   | 72                   | 23                    | 74     | 33     | 28                   |
|                   |                   | <i>attL</i> coverage mutations  | 0                    | 0      | 0                    | 0                    | 0                     | 0      | 0      | 0                    |
|                   |                   | <i>egfp</i> coverage mutations  | 2 SNPs<br>1 deletion | 2 SNPs | 3 SNPs               | 10 SNPs              | 0                     | 5 SNPs | 4 SNPs | 8 SNPs               |
|                   |                   | <i>attR</i> coverage mutations  | 0                    | 0      | 0                    | 1 SNP                | 0                     | 0      | 0      | 0                    |

**Supplementary Table 4. Summary of the statistical analysis of the EGFP-positive cell percentages obtained by flow cytometry assays with the switch promoter system in plant protoplasts.**

|                                     |                                        |                |                                 |
|-------------------------------------|----------------------------------------|----------------|---------------------------------|
| Switch Promoter system - Protoplast | Mean $\pm$ sd                          | pGFP           | 39.12 $\pm$ 12.30 <sup>a</sup>  |
|                                     |                                        | pIE Int2 + pSP | 32.21 $\pm$ 5.88 <sup>b</sup>   |
|                                     |                                        | pIE Int4 + pSP | 38.57 $\pm$ 10.60 <sup>ab</sup> |
|                                     |                                        | pIE Int5 + pSP | 12.55 $\pm$ 4.57 <sup>c</sup>   |
|                                     |                                        | pSP            | 7.35 $\pm$ 2.46 <sup>d</sup>    |
|                                     |                                        | pIE Int2       | 0.00 $\pm$ 0.00 <sup>e</sup>    |
|                                     |                                        | pIE Int4       | 0.01 $\pm$ 0.02 <sup>e</sup>    |
|                                     |                                        | pIE Int5       | 0.01 $\pm$ 0.02 <sup>e</sup>    |
|                                     | Assays Repetition (n)                  |                | 3                               |
|                                     | Kruskal-Wallis statistics ( $\chi^2$ ) |                | 64.99                           |
|                                     | df                                     |                | 7                               |
|                                     | p-value                                |                | 1.51 x 10 <sup>-11</sup>        |

Different letters indicate significant differences among the data obtained by the Kruskal-Wallis test at the 5% statistical probability level.

**Supplementary Table 5. Number of PCR cloned sequences after Int activity on the switch promoter system and observed covered mutations in protoplasts.**

|  | Int2                                        |                        | Int 4                                       |                        | Int 5                                       |                        |
|--|---------------------------------------------|------------------------|---------------------------------------------|------------------------|---------------------------------------------|------------------------|
|  | Switch Promoter system - Protoplast         | Total sequenced clones | 32                                          | Total sequenced clones | 28                                          | Total sequenced clones |
|  | Selected high quality sequences             | 56                     | Selected high quality sequences             | 39                     | Selected high quality sequences             | 54                     |
|  | <i>attL</i> Int 2 coverage mutations        | 0                      | <i>attB</i> Int 2 coverage mutations        | 0                      | <i>attB</i> Int 2 coverage mutations        | 0                      |
|  | <i>attP</i> Int 4 coverage mutations        | 0                      | <i>attL</i> Int 4 coverage mutations        | 0                      | <i>attB</i> Int 4 coverage mutations        | 2 SNPs                 |
|  | <i>attP</i> Int 5 coverage mutations        | 0                      | <i>attP</i> Int 5 coverage mutations        | 0                      | <i>attL</i> Int 5 coverage mutations        | 1 deletion             |
|  | 5' end CaMV 35S promoter coverage mutations | 0                      | 5' end CaMV 35S promoter coverage mutations | 0                      | 5' end CaMV 35S promoter coverage mutations | 1 SNP                  |
|  | 3' end CaMV 35S promoter coverage mutations | 0                      | 3' end CaMV 35S promoter coverage mutations | 0                      | 3' end CaMV 35S promoter coverage mutations | 0                      |
|  | <i>attB</i> Int 5 rc coverage mutations     | 0                      | <i>attB</i> Int 5 rc coverage mutations     | 0                      | <i>attR</i> Int 5 coverage mutations        | 0                      |
|  | <i>attB</i> Int 4 rc coverage mutations     | 3 SNPs                 | <i>attR</i> Int 4 coverage mutations        | 0                      | <i>attP</i> rc Int 4 coverage mutations     | 0                      |
|  | <i>attR</i> Int 2 coverage mutations        | 0                      | <i>attP</i> rc Int 2 coverage mutations     | 1 SNP                  | <i>attP</i> rc Int 2 coverage mutations     | 0                      |
|  | 5' end <i>egfp</i> CDS coverage mutations   | 1 SNP                  | 5' end <i>egfp</i> CDS coverage mutations   | 0                      | 5' end <i>egfp</i> CDS coverage mutations   | 0                      |

rc: reverse complement orientation

**Supplementary Table 6. Number of PCR cloned sequences after Int activity on the switch GFP system and observed covered mutations in PBMCs.**

| Switch GFP system               | Cell type | Sequence description | Int 4   |                        |         | Int 13  |         |         | phiC31  |         |         | Bxb1    |         |         |
|---------------------------------|-----------|----------------------|---------|------------------------|---------|---------|---------|---------|---------|---------|---------|---------|---------|---------|
|                                 |           |                      | Donor 1 | Donor 2                | Donor 3 | Donor 1 | Donor 2 | Donor 3 | Donor 1 | Donor 2 | Donor 3 | Donor 1 | Donor 2 | Donor 3 |
|                                 |           |                      | PBMC    | Total sequenced clones | 10      | 8       | 8       | 11      | 9       | 11      | 9       | 9       | 11      | 9       |
| Selected high quality sequences | 17        | 16                   |         | 14                     | 22      | 17      | 20      | 17      | 16      | 19      | 17      | 20      | 22      |         |
| <i>attL</i> coverage mutations  | 0         | 1 SNP                |         | 0                      | 0       | 1 SNP   | 0       | 0       | 0       | 0       | 1 SNP   | 0       | 1 SNP   |         |
| <i>egfp</i> coverage mutations  | 3 SNPs    | 1 SNP                |         | 6 SNPs                 | 10 SNPs | 5 SNPs  | 7 SNPs  | 1 SNP   | 2 SNPs  | 3 SNPs  | 5 SNPs  | 3 SNPs  | 0       |         |
| <i>attR</i> coverage mutations  | 0         | 0                    |         | 0                      | 0       | 0       | 1 SNP   | 0       | 0       | 0       | 2 SNPs  | 0       | 0       |         |

**Supplementary Table 7. Identification, sequences and target systems of the primers used in this study to amplify *attL* and *attR* sites formed after Int activity in HEK 293T cells, bovine fibroblasts, plant protoplasts and PBMCs.**

|                        |                                |                                           |                          |
|------------------------|--------------------------------|-------------------------------------------|--------------------------|
|                        | Primers to amplify <i>attL</i> |                                           |                          |
|                        | Promoter                       | Forward primer (5' > 3')                  | Target System            |
|                        | EFa_966F                       | TTCTCGAGCTTTTGGAGTACGTCGCTTTAGGTTG        | Mammalian                |
|                        | 35S_282F                       | ATTGATGTGATATCTCCACTGACGTAAGGGATGACGCAC   | Plant                    |
|                        | <i>attR</i>                    |                                           | Reverse primer (5' > 3') |
| Switch GFP system      | attR_Int2_R                    | GTGTCTACGCGAGATTCTCGCCGGACCGTCGACATACTGC  | General                  |
|                        | attR_Int4_R                    | AGTTTTCAACCCTTGATTTGAATAAGACTGCTGCTTGTTGT | General                  |
|                        | attR_Int5_R                    | ATAACTCTCTGGGAGCGCTACACGCTGTGGCTG         | General                  |
|                        | attR_Int7_R                    | CTGTGTGAGAGTTAAGTTTACATGGGCAAAGTTGATGAC   | General                  |
|                        | attR_Int9_R                    | TGGAAGTGTGTATCAGGTAACCTGGATACCTCATC       | General                  |
|                        | attR_Int13_R                   | GTAGAACTTGACCAGTTGGTCTGTAAATATAAGCAATCC   | General                  |
|                        | attR_phiC_R2                   | CCAACCTGGGGTAACCTTTGGGCTCC                | General                  |
|                        | attR_Bxb1_R2                   | CTGGTCAACCACCGCGGTCTCCGTCGTCAGGATC        | General                  |
|                        | Primers to amplify <i>attR</i> |                                           |                          |
|                        |                                | <i>attL</i>                               | Forward primer (5' > 3') |
| Switch GFP system      | attL_Int2_F                    | GGAGTAGCTCTTCGCCCGAGAAGCTTCTGCAAG         | General                  |
|                        | attL_Int4_F                    | CGACCTGAAAATTTGAATTAGCGGTCAAATAATTTGTA    | General                  |
|                        | attL_Int5_F                    | GACGGCCTGGGAGCGTTGACAACCTTGCGCACC         | General                  |
|                        | attL_Int7_F                    | GTCCGTCTGGGTGAGTTGCCAACCCTTAACCTTTTAC     | General                  |
|                        | attL_Int9_F                    | ATAATTGGCGAACGAGGTATCTGCATAGTTATTCCGAAC   | General                  |
|                        | attL_Int13_F                   | TCCAGATCCAGTTGTTTTAGTAACATAAATACA         | General                  |
|                        | attL_phiC_F                    | TGCCAGGGCGTGCCCTTGAGTTCTCTCAGT            | General                  |
|                        | attL_Bxb1_F                    | TGTCGACGACGGCGGTCTCAGTGGTGTACGGT          | General                  |
|                        | Backbone                       | Reverse primer (5' > 3')                  | Target System            |
|                        | TermiAni_205R                  | AATGATTTGCCCTCCCATATGTCTTCCGAGTG          | Mammalian                |
|                        | NOS <sub>t</sub> _283R         | ATAACAATTTACACAGGAAACAGCTATGACATGATTACG   | Plant                    |
|                        | BB_Termi_R*                    | GTA AACGACGGCCAGTGAATTGTAATACGACTC        | Plant                    |
| Switch Promoter system | Primers to amplify <i>attL</i> |                                           |                          |
|                        | Backbone and Promoter          | (5' > 3')                                 | Target System            |
|                        | Pré_Ints_sitesAt_312F          | GCGAAAGGGGGATGTGCT                        | Plant                    |
|                        | 35S_125R                       | TAGGAGCCACCTTCCCTTTTCC                    | Plant                    |
|                        | Primers to amplify <i>attR</i> |                                           |                          |
|                        | Promoter and <i>egfp</i>       | (5' > 3')                                 | Target System            |
|                        | 35S_64F                        | ATCCTTCGCAAGACCCCTTCC                     | Plant                    |
|                        | SGFP_150R                      | TGGTGCAGATGAACTTCAGG                      | Plant                    |

\*used only with attL\_phiC\_F and attL\_Bxb1\_F

## Supplementary Methods

Genetic part sequences used to build the vector sets (5' > 3')

Integrase recognition sites (orange: core)

*attB* Int 2

ggacggcgcagaaggggagtagctctcgcggaccgctcgacatactgctcagctcgtc

*attP* Int 2 reverse complement sequence

agccaagagcagtgcttcgagaagttctcggcgagaatctcgcgtagacacatacatgagc

*attB* Int 4

ttccaagagcgcaccaacgcgacctgaaattggaatagactgctgcttgtaaaggcgatgatt

*attP* Int 4 reverse complement sequence

aaacgaattacaaattattgaccgctaattcaaatcaagggtgaaaactttgtaatttt

*attB* Int 5

gagcgcgggatcagggagtgacggcctgggagcgtacacgctgtggctgcggtcgggtgc

*attP* Int 5 reverse complement sequence

cagatcaggggtgcgaagttgtcaacgctcccaggagagttatcgactgctgattaggg

*attB* Int 7

agacgagaaacgttccgtccgtctgggtcagttggcgaagttgatgaccgggtcgtccgttcctt

*attP* Int 7 reverse complement sequence

aagctgaacctgcgtaaaagttaaggttaggcatgtaaacttaactctcacacaggtttataacacc

*attB* Int 9

tttatattgcgaaaaataattggcgaacgaggtaaactggatacctcatccgccaattaaaatttg

*attP* Int 9 reverse complement sequence

taattggaagttcgggaataactatgcagatacctgatacacactccaacaaaaacaaccac

*attB* Int 13

gcatacattgttgtttttccagatccagttggtcctgtaaataagcaatccatgtgagt

*attP* Int 13 reverse complement sequence

tattcggagttgtatttatgttactaaaacaactggcaagttctacaaatacaaccgttattg

*attB* phiC31

tgccagggcgtgcccttgggctcccgggcgcg

*attP* phiC31 reverse complement sequence

ccaactgagagaactcaaggttaccagttg

*attB* Bxb1

tcggccggtgtcgcagcagcgcggtctcgtcgtcaggatcatccgggc

*attP* Bxb1 reverse complement sequence

gtcggggtttgtaccgtacaccactgagaccgctggtggtgaccagacaaaccacgac

Expected *attL* and *attR* sites resulting from inversion recombination  
(orange: core)

*attL* Int 2

ggacggcgcagaaggggagtagctctcgcggcggagaacttctgcaaggcactgctcttggt

*attR* Int 2

gacgagctgagcagtatgtcgcaggtccggcgagaatctcgcgtagacacatacatgagc



*attL* Int 4

ttccaagagcgcaccaacgcgacctgaaattgaaatagcgggtcaaataattgtaattcggtt

*attR* Int 4

aatcatcgctttacacaagcagcagcttattcaaatcaagggtgaaaactttgtaatttt

*attL* Int 5

gagcgcggatcagggagtgacggcctgggagcgttgacaactgcgaccctgatctg

*attR* Int 5

gcaccgaccgcagccacagcgtgtagcgctcccaggagagttatcgactgctgattagg

*attL* Int 7

agacgagaaacgttccgtccgtctgggtcagttgctaacttaactttacgcaggttcagctt

*attR* Int 7

aaggaaacggacgacccgggtcatcaactttgccatgtaaacttaactctcacacaggtttataacacc

*attL* Int 9

tttatattgcgaaaaataattggcgaacgaggtaaactgcatagttattccgaactccaatta

*attR* Int 9

caaatttaattggcggatgaggtatccagatacctgatacacactccaacaaaaacaaccac

*attL* Int 13

gcatacattgtgtgttttccagatccagttgttttagtaacataaatacaactccgaata

*attR* Int 13

actcacatggattgcttatatttacaggaccaactggcaagttctacaaatacaaccgttattg

*attL* phiC31

tgccagggcgtgcccttgagttctctcagttgg

*attR* phiC31

cgcgcccggggagccaaagggtaccccagttg

*attL* Bxb1

tcggccggtgtgcgacgagcgggtctcagtggtgtacggtaaaaaccccgac

*attR* Bxb1

gcccggatgatcctgacgacggagaccggtggtgaccagacaaaaccacgac

## Mammalian plasmid parts

### Ubiquitin C promoter

ggcctccgcgcgggttttgcgctcccgcgggccccctcctcacggcgagcgtgccacgtcagacgaagg  
cgcagcgcgagcgtcctgatcctccgcccggacgctcaggacagcggcccgtgctcataagactcggccttagaacc  
cagatcagcagaaggacatcttaggacgggacttggtgactctagggcactggtttcttccagagagcggaacagg  
cgaggaaaagtagtccctctcggcgattctcgggagggatctccgtggggcgtgaacgccgatgattatataaggac  
gcgcccgggtgtggcacagctagtccgtcgcagccgggattgggtcgcgggtctgtttgtggatcgtgtgatcgtcactg  
gtgagtagcggctgctgggctggccgggcttctggtggccgcccggcctcgggtgggacggaagcgtgtggagag  
accgccaagggctgtagtctgggtccgcgagcaaggtgccctgaactgggggtggggggagcgcagcaaaatggc  
ggctgttcccagagcttgaatggaagacgctgtgagcgggctgtgaggtcgttgaacaagggtggggggcatggtgg  
gaggcaagaaccaaggctttaggccttcgctaatacgggaaagctcttattcgggtgagatgggctggggcaccatc  
tggggaccctgacgtgaagttgtcactgactggagaactcgggttctgctgtctgttcggggggcggcagttatggcgggtgc  
gttgggcagtgacccgtaccttgggagcgcgcgcccctcgtcgtgtcgtgacgtcaccctctgttggctataatgcag  
gggtggggccacctgcccgtaggtgtcggtaggctttctccgtcgcagggacgcaggggtcgggcctagggtaggctctc  
ctgaatcgacagggcggaccctcgggtgaggggagggataagtgagcgtcagttcttggcgggtttatgtacctatct  
tcttaagtagctgaagctccggtttgaactatgcgctcgggggtggcaggtgtgtttgtgaagtttttaggcacctttgaaat  
gtaatcattgggtcaatatgtaatttccagtgtagactagtaaattgtccgctaaattctggccgtttttggctttttgttagac

### EF1alpha promoter

gctccggtgcccgtagtgggagagcgacacatgccacagtcgccgagaagtggggggaggggtcggaattga  
accggtgcctagagaaaggtggcgcggggtaaaactgggaaagtgatgctgtactggctccgcttttcccagggtg  
gggagaaccgtatataagtgcagtagtcgccgtgaacgttcttttcgcaacgggttgccgacagaacacaggtaatg  
ccgtgtgtggtcccgcgggcctggcctttacgggtatggccttgcgtgcctgaattactccacgcccctggctgag  
tacgtgattctgatcccagcttcgggttgaagtgggtgggagagttcgaggccttgcgcttaaggagccccctcgcctc  
gtgctgagttgaggcctggcctgggcgctggggccgcccgcgtgcgaatctggtggcaccttgcgcccctgctcgtgcttt  
cgataagtcttagccattaaaattttgatgacctgctgcgacgctttttctggcaagatagtctgtaaagcgggcca  
gatctgcacactggtatttcggttttggggccgcccggcgagcggggcccgtgcgtcccagcgcacatgttcggcgag  
gccccggcctgcgagcgcggccaccgagaatcggacgggggtagtctcaagctggccggcctgctctggtgctggcct  
cgcgccgcccgtatcgccccgcccctggcggaaggctggcccggctcggcaccagttgcgtgagcggaaagatggc  
cgctcccggcccctgctgcagggagctcaaaatggaggacgcggcgctcgggagagcggggcggtgagtcacccac  
acaaaggaaaagggccttccgctcctcagccgctcgttcatgtgactcacggagtaccggggcgccgtccaggcacctc  
gattagttctcagcttttgagtagctcgtcttaggttggggggaggggtttatgcatggaagttccccacactgagtg  
gtggagactgaagtagccagcttggcactgtatgtaattctccttgaattgcccttttgagttggatcttgggtcattctca  
agcctcagacagtggtcaaagtttttctccatttcaggtgctgta

### *egfp* reverse complement sequence

ttactgtacagctcgtccatgccgagagtgatcccggcgggcggtcacgaaactccagcaggaccatgtgatcgcgcttctc  
gttgggtctttgctcagggcggactgggtgctcaggtagtggtgctgggcagcagcacggggccgctgcggatgggg  
gtgttctgctgtagtggtcggcgagctgcacgctgccgtcctcgtatgttggcgatctgaagttcaccttgatgccgttct  
tctgctgtcggccatgatatagacggtgtggctgttagttgactccagctgtgccccaggatgttggcgtcctccttgaag  
tcgatgccctcagctcgtatgcggttaccagggtgctgccctgaactcacctcggcggggtctgtagttgcccgtcgtc  
ctgaagaagatggtgcgtcctggacgtagcctcgggcatggcggactgaagaagtcgtgcttcatgtggtcggg  
gtagcggctgaagcactgcacgccgtaggtcaggggtggtcacgaggggtggccagggcagggcagcttgcgggtg  
gtgcagatgaactcagggctcagcttgcgttaggtggcatgcctcgcctcgcggacacgctgaactgtggccgttt  
acgtcgcgtccagctcgaccaggatgggaccaccccgggtgaacagctcctcgccttgcctaccat

### $\beta$ -globin poly(A) signal terminator

agcggccgcaactcctcaggtgcaggctgcctatcagaaggtggtggctggtgtggccaatgccctggctcacaataacc  
actgagatcttttccctctgcaaaaattatggggacatcatgaagcccctgagcatctgacttctggtaataaaggaa  
attattttcattgcaatagtgtgttgaattttgtgtctcactcggaaaggacatatgggagggcaaatcatttaaaccatc  
agaatgagtatttggtttagagttggcaacatatgccatgctggctgcatgaacaaaggtggctataaagaggtcatc  
agtatatgaaacagccccctgctgtccattccttattccatagaaaagccttgacttgaggttagatTTTTTtatttTgtgt  
tatttttcttaacatccctaaaattttccttactggtttactagccagattttcctcctcctgactactcccagtcagctgctc  
cctcttcttattgaagatccctcgacctgcagccaagcttggcgtaatcatg

### Integrase 2 *H. sapiens* codon optimized sequence

atgccatcgccccggagttcctgagttggcctatccgggacaagagtttctgcttctctacgggagggcttccaggg  
atccgaagagaaaaggtcgaagcgtccaaagccaattggacgaagggagggcaacctgtcttgatgctggatggcct  
attgctggggaattaaagatgtagacagatcagcatctgcctatgctaggaggacgcgagatgaattgaagagatgat  
cgcaggaatccaggcgggggagtgccggattctgtggcttccgaagcgtctcgatattacagagattggaggcctatgtt  
cggctcggcgagctgcccgggaagcaggcgttcttcttgcataacggtcagggtgacgatcttagtaagagtgagata  
gaaaggcgacggctcaggatgcggtgaacgcagaaggcgaagccgacgatataagagaaagaaacctccgacc  
accagacttaatgccaagcgagggggagctcatggccctgtcccagatggatataagagacgatatgatccagattcc  
ggagatctgtcgacaaaatcccgcaccccagacagagccggttgataactgagatttttaggcgggagcggcgggccg  
agccactggccgctatctgcccagatctcaatgagagggggcgaactaccaccgaggcaagcatggcagaggca  
ccacctgcatgcatcctcgcaatccagcttatacggctatagaagacatctcgggtgtgacacaggtaaaggaatgtg  
ggcactatttgcgatgatgaggacttgcggaaacctttcaggctgtccaggaaatcctcagcttccaggagacagtt  
gagcccgggcccgaagcgcacatttgcagacagggatcgcactttgcggagaacacccggacgaaccgcccgtta  
ggagtgtgactgttcgaggccgcacaaattacaattgtccacaagatacagatgtggcgatgcgagaagaccgcatgga  
tgcgttctcagaggagtcctcatcacgtggctggcctccgacgaagcagttgcagctttgagataatactgacgatga  
acggacaagaaaagcgaggatcagactcaaagttcttgaagagcagctcagggtgcacaaaaacaggctagaac

actccgcccggacggaatgggcatgctccttagtatagattccttggccggcttgaagccgaacttactccacagatag  
acaaggcgaggcaggagagctggctcttgcacgtaccgctcttggagagacctgtgggcaaaccgagctgatgtt  
gaccgcatggaacgaagcactcacgtgccccagcgccaatgatactgcatggtgtcactatccgctcttcaa  
agcaggatctcgagggtacggcgatagagccagggtcgaattaccttgagttatgttggagaaccaggatttaagcccc  
tgggcgaaatcgagcaaacagtaa

#### Integrase 4 *H. sapiens* codon optimized sequence

atgatcaccacacgcaaggtggccatatacgtccgctatctacgactaatcaagccgaagaggatattctatacagg  
gcaaatacgattcccttcaagtactgagggctatgggttgatcatataggaatatactgacgcaggggtttcagg  
cggcaaaatgatcgcccgccatgagtaagcttattactgatgcaaacacaagagattcgataccattctggtgtaca  
aattggatcggctgtcaagaagcgtgcgggatacacttacttggttaaggatgtatthaatcaaaacaacatccactctgc  
tccctcaggagaatcgacacatctccgcatgggaaatctttttgaccctccttctgccatagcggagttgagcga  
gagcagatcacggagcgcgatgaccatggggaaaataggtcgggcaaatcaggaagacaatggcgtggacata  
caccgttcggctacgattataataaggagaaggggtgaactatactgatcctgccaaggcaccatcgtgaaaatgat  
acaccgattactgaagggatgtcaattcaaaagatagtgataaactcaataaaatggattacaacggcaaggattgc  
acatggttccccacggcgtgaacatctcttgataatccggtgtactacggtatgacaagatataacaataagctttccc  
cggcaatcatcagccgataattacaaggagttgttgataagaccagcgagagacaacggaggcgactcggca  
tcgaggaaccattatacaataaccgttcaggcaaaatatactcagtaagttcctcagggtgcagcagtcggctccc  
gaatggggctgaattgggtcgcccgcaagaaggaaggcaagcgcagtaagaataactactgcctcaatagccga  
ccgaaacggacagctcatgtgacactcccctgatgacgcccgaaccctggaagattatgtctgcacgaaatagcta  
aaatacagaaagaccctcaatagcaagtagacagaagcatattgaagatcacgaaactcaatataagcgagaacg  
catagaggcaatataaataaaaccgtgaatcaacttagcaagctgaacaacctttacctaacgacctcattactctga  
ggacctcaagacacagactaacacactcatcgcaaaaagcggctgttgagaatgaactgacaagacatgagata  
atgacgacgaactgacagacaagagacaatagcggacttctggcattgccagacgttggactatggactatgaagg  
caaaagtatgccgtggagcttctcgttcagcgctcaaagttgacagagacaacatagacatacattggacgtttaa

#### Integrase 5 *H. sapiens* codon optimized sequence

atgccgggaatgaccacggaaaccggaccagatccggcaggttgatagacctgtttgcccgaatctaaggcagtg  
aaaagccgggctaattggagctgggcaacggagaaaacaggaaatctctattgctgctcaggagacgctggggcgca  
aggtcgtgccctgctcggcatgcaagtccgcatgtgtggaaggaagtaggtagcgcgagtcgattcagaaagggaa  
aggcaagggatgatcagagtaaagccctaaagcacttgagagtggggaggtcggggcgctctggtgctatcggcttg  
accgatgggataggggagggcgggagcaattctaaaattatagagcccaggatggcatgccgcaagattgctttt  
cggctgggatgaggatacaggtcagccgtattggattctacaataaaagggaccgggggtgagctgatcagacgagc  
ggaggaagcccagagaagaagcagaaaaactgtcagagcgcgtccgcatgactaaggcacatcagcgcgagaacg  
gggaatgggtaaacgcgcgcaccatattgctcagtggtcttggtgactgttagtgatgaggagggcgacgagta  
tgtgaaaggaattggctgcagacgatgaagatgctggtgaccgagtggtctcaaaaagctgaagcggcagcggct  
ggtcttactctcccgttaccgaccgacttctcagcaggtaccgcccattgcaatgaactcgggaaattccatcacc  
gacagggcgtccatggatagctgtgacagttagggacatgatccagaaccccgttatgcccgggtggcagaccacag  
gcaggcaggatgaaaacaaaggcgttgacattctacaacggagaggggaaaagggctctgtcatgcacggccc  
accctgtaacagatgaagaacaggaagcggccaaggcggcagtaaaaggcgaagacggagtaggtgtccgct  
tgacggctcagatcatgacacacgcccgaacatctcctcagtggtaggatgcatgctccgggatgtggtggctcatgct  
cctactcaggtaacggtaccggtgttgagatctagtgttaaagggggctgtccagcaccgacgtacgtggccagaaa  
gtcagtcgaggagtatgtggcttttaggtgggcccgtaaaactggcggcctccgagcctgatgaccctttgtaatagcttg  
gcagatcgtggcagctttgacacaccacaggctccgaagatgaaaaatacgtaaaagctgcggttcgagaagca  
gagaagaatctggccggctgctgcgagaccggcagaacggcgtctatgatgggcccggagcagttctttgcgccg  
gcttatcaagaagcccttcaacgctgcaggcggtaaggatgctgtctcagaaaagctccgcatccgacagcagtgatg  
aagttgatagtgatagttccgattacgaggagctgtggctcgggagccccgacaatgaggaatgagattatgata  
cttgcacgacgagatttgggtggcaagggaacagaggagaccggttgatggagatgaacgggtcaagattaaat  
gggcagctcggacgtaa

#### Integrase 7 *H. sapiens* codon optimized sequence

atgaaggtagctatatacgtccgctctcaacagatgaacaagctaaggagggttctccattccggcgagagagag  
aggctcagggctttttgtgccagcaaggggtgggagatcgtgcaagaatatacgaaggggctggagcgcaaacggc  
cttgatcggccacagatgcagcagattgctgaaggacataaaaaaagggaaacatagacatagtgctggtctataggctg  
accgacttaccaggtcagctcctcagctctacgttctcctcaaacattcgaaaagtataacgtagccttccgatccgctac

cgaggttacgacacaagcacagctatggggcgactttttattaccttggtgccgcttggcgcaatgggaacgcgaaaa  
tctcgcagagagagtaaagttcggcatagAACAGATGATCGATGAAGGCAAAAAGCCTGGTGGGCATTACCATATGG  
CTAAAGTTCGATAAGACTTCAACTGTACGATTATTGAAGAGGAGGCAGACGTTGTTAGGATGATACCGCATGTACTGC  
GATGGATATGGCTATAGGAGTATTGCCGATCGACTGAATGAGCTTATGGTAAAACCAAGAATAGCTAAAGAGTGGAAATCA  
TAACAGTGTTCGCGACATCCTTACTAACGCATATATATCGGCACGTACCGATGGGGAGACAAGGTGGTCCAAACAACC  
ACCCACCTATCATTAGTGAACTTGTTAAGAAAGCGCAAAAAGAAAAGAAAAGCGGAGGAGTGGATCGAAAGAGA  
GTTGTAAGTTCCTGTTACTGGTCTTCTCCAGTGTGTAATTGTGGAGGACACAAGATGCAGGGGCACCTCGACAAACGCGA  
GCAAAAGACTTACTACAGATGCACGAAGTGTACAGGATTACCAATGAGAAAAATCCTGGAACCTTGTGGATGAG  
ATACAGTGTCTGATAACATCCAAGGAATTTTATGCTAAATTTAGTGACCGATATGATCAACAGGAAGTAGTAGACGTTTCT  
GCTCTACGAAAGAAGTGGAGAAGATCAAGCGCAAAAAGGAGAAGTGGTATGATCTCTATATGGACGATCGCAATCCC  
ATTCTAAGGAAGAGTGTTCGAAAATCAATGAAGTGAACAAGAAAGAAGAAGAGATATATCCAAGTTGAGCGAG  
GTAGAGGAGGACAAAGAGCCCGTCAAGAGAAATGCAATAGACTGTCCAAGATGATTGATTTAAGCAGCAATTCGAA  
CAGGCGAACGACTCACGAAAAAGGAATGTTGTTAGCATATTTGAAAAATCGTAATTTATAGGGAAAAAGGTAAGCT  
GAAGAAGATAACTCTGGACTACACTCTCAAGTAA

### Integrase 9 *H. sapiens* codon optimized sequence

atgaaggtggcatttacacgcgagtgagtactttgAACAGAGGAGAAGGGGCATAGTATTGAGGAACAGGAACG  
CAAGCTGCGGGCCTACAGTGACATCAACGATTGGAAAATCCATAAGTATACACTGACGCAGGATACAGCGGGGCGA  
AAAAGGATCGCCAGCACTCAGGAAATGTTGAATGAGATTGATAATTTGACCTCGTCTCTACAAGTTGGATAGGCTT  
ACAAGGAGTGTGAAAGACCTCCTGAGATTCTCGAGCTGTTGAAAACAAGAAGCTCCTGTTAGATCAGCCACTGAGGTC  
TACGATACTACGTCAGCTATGGTGGCTCTTGTACTCTGTTGGCGCTATGGCTGAGTGGGAACGCACGACAATTCAGG  
AGAGAAGTGCATGGGGCGACGAGCGAGTGTCTCGAAAGGACTGTCCAAGACTGTTCCACCGTTTACTACGACAGGG  
TGAATGATAAGTTGTCCAACGAATATAAAAAGTCTCGCTCGCGTCAAGAGGCAAAAAAGGGACAAGCTT  
GCGAGAGATCACCATAAAGTGAATAACTCCAAGTATAAAGCTCCATTGGGCAAGAATTGGCATCGAAGTGTGATAGGA  
AATGCACGTACGAGCCCGTGTCCAGGGGCACTGTTGCGCACATTTTGTGAGAACACCCATGAGGCGATTATA  
AGTGAAGAAGAGTACGAGGAGATAAACTCAGGATCTCTGAGAAAACGAATAGCACAATAGTTAAGCACAACGCCA  
TATTCAGATCAAAAAGTGTGTCCAAATGCAACCAGAAGCTGACTGAATACCGTGAACATACCCCAAGAACA  
GGAGGTTGGTATTCTAAACTGTACTTCTGAGTAATTGCAAGAACACAAAAGAACAATAATGATGCAACATTGACGAGG  
GAGAGGTGTGAAGCAATTTATAATTACCTGAAGCAATTTGACCTGACGTCCTACAAAATAGAAAACCCAGCCGAAAGA  
AATTGAGGATGTGGGGATCGACATCGAAAAGCTTCGCAAGGAGCGGGCACGATGCCAGACACTTTTATTGAGGGCATG  
ATGGACAAAAGATGAAGCTTTCCATCATTCAAGAATAGATAAGGAGATCCATGAGTATGAGAAGCGGAAGGATAACG  
ACAAGGGGAAGACGTTCAACTACGAGAAGATAAAGAATTTCAAGTACTCCCTCTAATGGTGGGAAGCTATGGAAAGA  
CGAGCTGAAAACGGAATTCATAAAATGGCTATCAAAAACATCCACTCGAGTATGTGAAGGGGATTAAGGTAAGG  
ACAAAATAGTCTCAAGATAACCGGTATAGAGTTTACTAA

### Integrase 13 *H. sapiens* codon optimized sequence

atggcagtcggaatttatattcgagtttagtaccAAGAACAGGCGTCCGAAGGCCACTCTATAGAAATCCAAAAAAGA  
AGCTGGCCAGCTACTCGAGATTCAGGGATGGGACGATTATCGCTTACATCGAGGAAGGTATCTCCGGAAAAACAC  
AAATCGGCCAAAGTTGAAACTGCTCATGGAACATATTGAAAAGGGAAAGATTAATATTCTCCTGTATATCGCCTCGACC  
ACTCACAGCTCTGTATCGATTGCACAAGCTGCTTAACCTTTGAGGAGCATGGGTGTGATTTAAATCAGCGACAGAG  
ACCTATGATACGACGACAGCGAATGGTGCATGTCCATGGGTATTGTCAAGTCTCTGGCCAAATGGGAACAGAGAAT  
GTCCGAACGGATAAACTTAACCTTGAACACAAGGTGCTCGTCAAGGGGAGAGAGTGGAGCGATCCCCTACGGATT  
CGACCTCTCCGACGACGAAAAGCTGTTAAGAACGAAAAATCTCCATATTGCTGGACATGGTGGAAAGAGTGCAGAA  
CGGGTGGTCAAGTCAATCGGATTGTCAACTATTGAATCTTACTAATAATGATCGGAAGTGGTCCCAGGAGTGTCTGCGC  
TGCTGCGGAACCCGGCCCTGTACGGCGCCACAGGTGGAACGACAAGATCGTGAACACGCACGAAGGCATTAT  
CTCTAAAGAAAGATTAATCGGCTCAGCAGATATTGGCAGACCGTCCATACACCACCGAAGGGACGTGAAAGGTACT  
TATATATTTCAAGGGTCTTGCATGTCCCGTCTGCGACCAAAACCTGAGTGAACCGCTTTATTAATAAAACGGAAGGATG  
GGACGGAGTATTGCGGCTCTGTATAGATGCCAACATGCATAAAACAGAATAAATACAATCTTGCATCGGAGAAGC  
TCGATTCCTGAAGGCTCTCAATGAATATATGTCCACAGTAGAGTTTCAGACGGTTGAGGATGAAGTAATACCCAAAAA  
GTGAGCGAGAAATGCTCGAGTACAGCTTCAACAGATCGTAGAAAAGCGAGAGAAAGTACCAAAAAGGCGTGGGCCTC  
AGACCTTATGAGTACGATGAGTTGAAAAGCTGATGGTAGAAACGAGAGAAACGTATGATGAGTGTAAACAAAAGCTT  
GAGTCTTGTGAAGACCAATAAAGATCGACGAGACTTACTTAAAGAGATAGTTTATATGTTCCACCAGACGTTCAACGAT  
CTGGAGTCTGAGAAGCAAAAAGAATTTACTCAAAGTTTACTCGACGATTCGATACACTGTAAGGAGCAACAACCAAT  
CGGCCGGATAAATCAAGACGGGGAAAGGGAAGCAGAAAAGTTATCATAACGGAGGTTGAGTTCTATCAGTAA

phiC31 *H. sapiens* codon optimized sequence

atggacacatacgcaggagcgtatgatcggcagtcgccgagcgcagagagaacagcagtgccgcaagcccggcgacc  
cagcgcgacccaatgaagataaagcggcagacctccagcgggaagtagaaagagatggaggtagggttagattgt  
aggacattttccgaggctccaggaacctccgcattcggcagcggcagaacgacctgagttgagcgcacacctgaatgaat  
gtagggccggcaggctcaacatgatcatagtatatgacgtgtcacgctctccaggctcaagggtgatggacgctattccaa  
tcgtctcagagcttctcgtctcggagtgacctcgtcagcacccaagaagggtgtctcaggcaggggaacgtaatggat  
cttatacatcttattatgcgctcggagcgtcccacaaggaatcatccctcaagtccggaagatactcgataactaagaacc  
tgcagcgcgagttgggtggttatggtggtgaaaggccccatacggtttcaattggtgagcgaacgaaggagattacc  
aggaatgggcgcatggttaattggtgtaataaacaactggctcacagcacaacccccactgaccggccccctcgagttga  
acccgacgtgattagatgggtggtggcgggagatcaagacgcataagcaccttccggttaagccgggggtcacaggccgc  
aattcatcctggttctatcacaggttgtgcaaacggatggatgctgatgcggtgcttaccgggggaaacgatcggca  
aaaagacggttcatcagcctgggatccggccacggttatgcgcatacttagagaccacgcatcgcgggctttgcagc  
cgaggttatataaaaaaagccagatggcacacctaccaccaaataagaagggtaccggattcagcgcagatccga  
ttactctcaggcctgttgagctggattgcggtccgataattgagcccgtgaatggatgaactccaggcgtggctcgcgcg  
tagggggcgcggaaggccctgagccgagccaggctatactgtccgcatggataaactgtattgagagtggtgctc  
ggtaatgacctccaaaagaggagaagaaagcatcaaggattcatatcgatgcagaaggcgaaggtgtggaccct  
ctgcacctggtcaacatgaggggacatgcaatgtatcaatggctcgcctcacaagttgtagccgagcggatattcaat  
aagattagacacgccgaggagacgaggagactctgactgctctgggagggcagcccggcgtttgggaaactgac  
ggaggcccctgaaaaaagtgtgaaacgcgtaacctgtagcggagagagcggatgactcaacgcgttgaagaa  
ctttatgaggaccgggcagcagcgcctatgacggtccagtcgggcaaaagcactttaggaaacaacaggccgcact  
actcttcgacagcagggggcggaggaacgactcgtgagttggaagcggcagaggcccccaagttgcccttgacca  
gtggttccccgaagatgccgatgcagatccaacagggcctaagagctggtggggggcggcgtccgctgatgataaga  
gagtggttggctgtctggtgacaagattgtgtaaccaagtcaactactggtcggggtaaggtacccaatagaga  
agcggggcagcataacatgggcaagcccccgacggacgacgatgaggacgatgctcaagacggaaccgaagat  
gtgctgcttag

Bxb1 *H. sapiens* codon optimized sequence

atcggggcactggtggaattaggctctccagagttactgacgctacgaccagccctgagaggcaactgaaagctgcc  
agcagctctgtgcgaacggggctgggacgctggtgagtgccggaagacctcgatggttccggtgcagtagatccctc  
gataggaagcggcgcccgaatttgctcgtatggctcgttccgaagagcaaccattcgatgtgatcgttgcctatcgagtc  
gacaggttgacaagaagtattcggcatctcaacaattggttcattgggcagaagatcacaataaattggtgtctccgcta  
cggaaagcacactttgatacaactacaccgttgcagcagttgtcatagctctgatgggtaccgttcacaaatggaattgg  
aagctattaaagagcgaatcggagcgcgcgacttcaacatcagggcaggcaagtagccgagcagctcccaccc  
tggggctacctgcccactagagtgatggcgaatggcgggtgggtcccgacccgggtcaacgggaagaatcctgaa  
gtgtaccatcgagttgtgacaatcacgagccccctcacctggtagctcatgattgaatcgcggggagttttgagcccga  
aagattttcggcagctgcaaggaggggaaccacagggctcgggagtgagtgctactgctgaaaagatccatgat  
tagcgaagccatgctgggatacgaacccttaacggcaaaaccgttagggacgatgacggagcgcctggttcggg  
ccgaaccaattctactcgcgagcaactggaagcactcgggctgagctggtcaaaacatcacgggctaaaccggcg  
gtgagcacaccaagttgttctcagagttgtttgcccgttgggagagccagcatacaagttgcccgggggtgggag  
aaaacatccccgctatagatgccgagcagtggttcccgaagcattgtgaaacggtagcagtagcagtggtgagtg  
ggatgattctgcgaagaacaagtccttgactgctggtggcagcagaacgcctggaaaaggatgggtagctgggtcc  
gactccgctgtagaactgctgaagtcaatgcagaactggtcagatctcacatccctattggtctccagcgtaccgagctg  
gctccccgcaacgcgagggcactgatccagaatagcggcactcgcgagacaagaggaattggaggggttggga  
agctagaccttctggatgggaatggagggaaacagggcagcgttcggggattggtggcgcgagcaagatactcggg  
cgaagaatacgtggttaggagcatgaacgtccgctgacgttcgacgttagagggggcttaccaggactatcgattc  
ggagattgacaggagatgaacaacacttgaggctggttagcgtagtgagagagactgcatacagggatgcttag

Plant plasmid parts

Actin2 promoter

aaaattagaacgaacttaattatgatctcaaatacattgatacatatctcatctagatctaggttatcattatgtaagaaagttt  
tgacgaatatggcagcacaataatggctagactcgatgtaattggtatctcaactcaacattatactataccaaacattagtt  
agacaaaattaaacaactatttttatgtatgcaagagtcagcatatgtataattgattcagaatcgttttgacgagttcggat  
gtagtagtagccattatataatgtacataactcgtgaatagtgaaatgatgaaacattgtatctattgtataaataatccata

aacacatcatgaaagacactttcttcacggctgaattaattatgatacaattctaatagaaaacgaattaaactacgtgga  
attgtatgaaatctaattgaacaagccaaccacgacgacgactaacgttgccctggattgactcggtttaagtaaccacta  
aaaaaacggagctgcatgtaaacgcggatcgagcaggtcacagtcataagccatcaaagcaaaagaactaatc  
caagggctgagatgattaattagtttaaaaattagttaacacgaggaaaaggctgtctgacagccaggtcacgttatcttt  
acctgtggtcgaaatgattcgtgtctgtcgatttaattttttgaaaggccgaaaataaagtgtgaagagataaaccg  
ctataaaattcatatatttctctccgcttgaattgtctcgtgtcctcactttcatcagccgtttgaatcctcggcgactg  
acagagaagaacaaggaagaagactaagagagaaagtaagagataatccaggagattcattctccgtttgaatctc  
ctcaatctcatcttctccgctcttcttccaaggtaataggaacttctggatctactttattgtggatctcgatctgtttctca  
attccttgagatctggaattcgtttaattggatctgtgaacctccactaaatctttggtttactagaatcgatctaagttgacc  
gatcagttagctcgattatagctaccagaattggctgaccttgatggagagatccatgttcatgttacctgggaaatgatt  
gtatgtgaattgaaactgaactgtgaaagttagattgaatctgaacactgtcaatgttagattgaatctgaacactgtttaa  
ggttagatgaagttgtgatagattctcgaaactttaggattgtagtgctgacgttgaacagaaagctatttctgattcaatc  
agggttatttgactgtattgaactcttttgtgtgttcagctcataaaaa

### CaMV 35S promoter

taattcatcaaattataactatagaccctaatttcatatgagactttcaacaagggaatccggaaacctcctcggat  
tcattgccagctatctgactttattgtgaagatagtgaaaaggaagggtgctcctacaaatgccatcattgcgataa  
aggaaaggccatcgtgaagatgcctctgccgacagtggtcccaaagatggacccccaccacgaggagcatcgtgg  
aaaaagaagcgttccaaccacgtctcaagcaagtgattgatgtatctccactgacgtaagggtgacgcaca  
atccactatcctcgcaagaccttctctatataaggaagttcatttcatttggagaggactaactgtgccaattatctcc  
aaactcctaattcaatt

### *egfp* reverse complement sequence

ttactgtacagctcgtccatgccgagagtgatcccggcggcgggtcacgaactccagcaggaccatgtgatcgcgctctc  
gttgggtctttgctcagggcggactgggtgctcaggtagtggtgtcgggcagcagcaggggcccgtcgcgatgggg  
gtgtctgctggtagtggtcggcagctgcacgctgccgtcctcgatgttggcggatctgaagttcaccttgatgccgttct  
tctgctgtcggccatgataatagacggtgtggctgtttagttgtactccagctgtgcccaggatgttccgtcctcttgaag  
tcgatgccctcagctcgatgcggttaccagggtgtcgcctcgaactcacctcggcggcgggtctgtagttgccgtcgtc  
cttgaagaagatgggtcgcctcctggacgtagcctcgggcatggcggacttgaagaagtcgtgcttcatgtggtcggg  
gtagcggctgaagcactgcacgccgtagggtgaagggtgacaggggtggccagggcacgggcagcttgcgggtg  
gtgcagatgaactcagggtcagctgccgtagggtggatcgcctcgcctcgcggacacgctgaactgtggccgttt  
acgtcgcctcagctcgaccaggatgggcaccaccccggtgaacagctcctcgccttgcaccat

### NOS terminator

gaattccccgatcgttcaaacatttggcaataaagtttctaagattgaatcctgttgcggctcttgcgatgattatcatataatt  
tctgttgaattacgttaagcatgtaataatttaacatgtaatgcatgacgttattatgagatgggttttatgattagagctccgca  
attatacatttaatacgcgatagaaaacaaaatcgcgcgcaaaactggataaattatcgcgcgcggtgtcatctatgag  
gactagatcg

### Integrase 2 *A. thaliana* codon optimized sequence

atgccaatagcgcagaatttctcacttgcttatccaggtaagagttcccgcgtacctttacggacgagcttctaggg  
atccgaaacgtaagggaagatctgttcaatctcaattagacgaaggagagctacgtgtctcgatgcagggtggccaatt  
gctggtgagttcaaagatgtcgatagatcggcctccgcatatgctagacgtacacgtgacgaatttgaggaaatgatagc  
aggaattcaggccggcgaatgtagaattctcgtggccttgaagcatccagatattatcgagatttagagggcgtatgtcag  
gcttagacgagatgtcgtgaagccggagttctgtgtgttacaacggctcaggtttacgatttaagcaaatccgcccaccga  
aaagcgaccgcacaggacgccgtaatgcagagggtgaggcagatgatattagagaacgtaatttgagaacaactag  
attgaatgcaaagagaggaggcgtcatggccccgtcctgtatgggtataaaaggagatacaccctgattcagggtgat  
ttagttgatcaaatccacatccagatagagctgggtcgtataacagaaatattccgtagggcagcagcggccgagcctct  
cgctgctatgtcagacttaaacgagagaggagaacaaactcatagaggtaaagcatggcaaggcaccatctgc  
acgctatcctgagaaatccagcgtacatcgggtataggagacatcttggcgtggatacaggtaagggaatgtgggcacc  
aatatgtgatgatgaagactcgtgaaacattccaagctgtccaggaaatactctttaccaggaaggcaactatcgcc  
cggaccagaagcccaacacctacagactggcattgctttatgcgggtgagcatccagacgagccaccactacgttcggtc  
actgtaagaggtagaactaattacaactgttctacacgatatgatgttgcgatgaggaggatcgatggatgctttgtgga  
agaatcagttacttggcttgcgagtgatgaagcgggtggctgcttccaagataatacagatgatgagagaacgagaa

aagccagaattcgacttaaagttctagaagagcaattagaagccgctcaaaaacaggctagaacactccgtcctgatg  
ggatggggatgctctgtctatcgactctctgctggctcgcaggccgaactacgccacagatagacaaggcaaggcaa  
gagagcagatccctgcatgtaccgcacttttgctgaccttctaggcaagccacgagcagacgttgatcgtgatgaa  
cgaagctctaacctccctcagagacgtatgatacttaggatgggtgttacgattagactattcaaggcgggttctcgtggtg  
tcagggcaatagacctggctgaattacgctcagctacgttgagaaacctggatttaagccagtggtgtaacagagc  
aaaacagtga

#### Integrase 4 *A. thaliana* codon optimized sequence

atgattacgaccagaaaggtggctatatacgttcgtgacactactaatcaggctgaggaagggtatagtattcaaggt  
caaatcgattcactaataaagctcgaagctatgggtggatcatctatgaggaatatactgatgccgggtcagtgga  
gggaagattgataggccgctatgagtaaatcaacggatgcaaagcacaagagatttgatacattctgtctataaa  
cttgacagattaagtagatccgtcagggacacgttatacctggtaaggatgtctcaatcagaacaatatacacttcgtga  
gcctacaggaaaacatcgatacttctcagcgatgggtaattctattctgaccctctatcagcgatagctgagtttgagcga  
gaacaaattacggagcgaatgacgatgggcaagattgggagcgaacaaatctgtaagacaatggctggacataact  
ccttcggatacactacaacaaggagaaggagagctcatctgaccagccaaagctcctatcgtgaagatgattta  
caccgactatftaaagggtatccatacagaaaattgtgacaagctgaataagatggattacaatggtaaagattgca  
ctgggtcccgcagtgctgaagcactcctagacaatccagtctactatggaatgacaaggataacaacaaattattcc  
ctggaatcatcagcctattatcacaaggaactattcgacaagaccagagagagagacagagggcagcagattgggc  
attgaagagaatcattacacaattccattccaggctaaagtaacatgctgtctaaattctgctgatgcaggcagtgcggtcaa  
ggatggggctcgaactgggagacctcgtagaaggaaggtaaaaggtaaaagaaataactattgtctgaattctagacc  
taagaggacggcttctcgcgacactcccctatacagatgctgagacactggaagattacgtgctgatgaaattgccaaa  
tccaaaaggatccgtcaatcgcgagtcgacaaaaacatatacaggatcacgagttaaagtacaagcgtgaacgtattg  
aagccaatataataaaaaccgtaaatcaactgtccaagttgaacaattttgacctaaacgacttgatcacctggaggac  
ctcaagactcagacgaacacacttatagcgaagaaacgtctctcgaaaacgaactgataagacatgacgacaacgat  
gacgaacttgataggcaggaactattgcccacttctggctctacctgatgtgtggacgatggactatgagggccagaa  
gtatgctgtgagttgttagtccagagagttaaagtgacaggggataacatagatatacattggacctttaa

#### Integrase 5 *A. thaliana* codon optimized sequence

atgccaggcatgacgacagagaccggacccgacccggcagggtaatagacctgttctgtagaaaaagcaaaagctgt  
caaatctagggctaatggggcgggtcaaaggagaaaaacaggaaattccatagcagcgcaggagacgctcgggag  
gaaggtagcccgtgttaggaatgcaagtcaggcatgtatggaaggaggtaggatctgccagcagattcagaaaggg  
aaaggcagaggatgaccagtcaaagctctaaaggcccttgagtctggagaggtgggagcactgtggtgctatcgtcta  
gatagatgggatagagggggtgacgggtctatccttaagataatcgaaccggagggacgggtatgctcgtcgattgtgttt  
ggctgggacgaagatacaggcagggcgggtgctggacagtactaacaacgagaccgtggtgactaatacagcagag  
cagaagaggctcgtgaggagggcggaaaagcttagtgagagggtaagagataactaaagcgcacaaagagaaaacg  
gggaatgggtaaatgctagggcggctacggactcagggttgactgtcacagtatccgatgaagaaggcagatgagta  
cgtatgaacgaaagctgcagcagacgatgaagacgctggaggccggatggtctaacgaaagcggaggccgcacg  
actcgtgttcacactcccgtcactgatcactatcctacgcggaacggctcatgctatgaatacccgagaaataccctct  
ccgactggggggccatggattgccgtaacggctcagggatagatacagaaccccgcctacgcgggctggcagacaac  
cgggcgacaggacggtaaacacgaagacttacctttataatgggtaaggaaagcgtgttagcgtgatgcacggacc  
accactgttacggatgaggaacaggaggcagcgaaggcagcggtaaggagagggatggggctcggagttcccttag  
acgggtcagaccatgacacgaggcgaagcatctactctcgtgccgaatgcatgtctcgtgctcgggggctcctgtca  
tacagtggcaatggctatagatgttgagatcttcagtcacaaaggcgggtgccccgccccacgtatgtcgcgaggaagtc  
cgtagaagagtatgttcttttaggtgggtgctagctcgtcctcagagccggatgatcctttgtatagcggttgcaga  
taggtggcggcgttaaccatcctcagggcagcgaagatgagaaatgccaagctgccgttcgagaggcagaga  
aaaatctagggcgttctgctgatcgacaaaatggagctacgacgggcccggcggagcaattttcgcacccgcata  
caagaggcattaagcacactcaggcagccaaggatgccgttagtgaagctcagcagtgctgctgtagacgtgagc  
tggatcgtagacagtagcattacgaggagctatgggttaagagctacggcacaatgaggaatgccataatagacacg  
tgtatagatgagattgggttcgaagggctcagaggggaaggccgttcgatgggacgagcagtaaaagattaaatgg  
gcagcgcgtacataa

#### Integrase 7 *A. thaliana* codon optimized sequence

atgaaggtagcgtatgtcctgtgtcaactgatgagcaggccaaggaaggatttccatcccagcgcagagagaaa  
gattaagggcattttgtcctcacaaggctgggagatcgtacaggagatatacgaagaggggtggtctcgaaggattg  
gacagacctcagatgcagagactgcttaaggatataaaaaaaggtaacatcgacattgtcctcgtatacaggttgata

ggctaactaggtccggtctggatctttatctgctcctgcaaacatttgagaagtacaacgtggctttcgtagtctacggagg  
tatacगतacgcaactgcaatgggcccgtttattcattaccttagtgccgctctggcacaatgggagcgtgaaaacctggc  
agagagggtaaaattggaattgaacagatgattgacgagggcaagaagcccggaggtcacagtcctacgggtataa  
atttgataaggacttcaactgactataatcgaggaggaagctgatgctgctgctgattacaggatgactgctgatggat  
atggctaccgtagtatcgccgaccgacttaatgagttgatggcaaacccaggatagccaaggaatggaatcataattcc  
gttcgagatattcttacaacgatatttataaggtacatacaggtgggggataaagtagtccccataatcatccgccaat  
aatctccgaaactttgtcaaaaaagcacagaaggaaaaagaaaagcgtggcgtgaccgaaagcagctcgaaag  
ttcttttacaggactgttgcaatcggggaattcgggggacacaagatgcaagggcacttcgataagcgtgagcaaaa  
gacttattaccggtgactaaatgccaccgtatcacaacgagaagaacatactagagccacttctgacgagatacagtt  
gttaattacgagtaaaagagtactttatgagtaaatttagcgacagatacगतcaacaggaggtgtagacgtgagcgcgct  
gactaaagaactggagaagataaaagaggcagaaggagaagtggtagcattgtatggacगतcgaatccगतcc  
ccaaggaagagctatttgccaaaataaacgaattgaacaagaaagagaggagatataagtaagctaagtgaaagt  
gaagaagataaagaaccggtagaagagaagtacaaccgctctccaaaatgattgatttaaaacaacagttcgaacaa  
gcaaatgatttcacaaaaaaggaactttgttctctatctcgaaaagattgtaatctatagagagaaaagggaaattaa  
aagatcacactagattatactttgaagtaa

Integrase 9 *A. thaliana* codon optimized sequence

atgaaggtcgctatatacaccagagtaagcactctggagcaaaaggagaaaggtcattctatagaagaacaggagag  
gaagctcagagcatactccgatataaacgattggaaaattcataaagtatacagacgcccggctattccggggcgaag  
aaagaccgaccagcactacaagagatgttgaacgaaatagataacttcgatttggtgctcgtttataagctcगaccgact  
cactcgttctgcaaacactactgaaattctgagctatttgagaataaaaaatgactcttcगतctgगaccgaagtcta  
tgataccacatcagccatgggacgacttttcgtgacgttggtggcgcgatggcagagtgggaaagaacgactattcaa  
gaaaggaccgcaatgggaagacgtgccagtgccagaaagggcttcgaaaacggtacctctttctattatgacagg  
gtcaatgacaagttcgtcctaagtagtacaagaaagtgtgcttgcgcttgcgctggaagaagcgaagaaaggactagc  
cttagagaaataacaatcaaacgtaataacagcaagtacaaggcgccactcggaaaaaatggcacaggtccgtaat  
cggaaacgcactcacctcacctgtgctagaggccatctagatttggggacattttcgtggagaacactcacgaggcgat  
aatacगagaagaggtagcगaggaaattaagcttagaatctctgagaagacgaaactcaacaatcgtaaacataatgc  
गतcttcaggagtaaaactactatgtccaactgcaatcaaaagcttaccctgaataaccgtaaacatacaccgaagaata  
aggaagtgtgattcaaagctataatttctgagtaactgtaagaatacgaaaaataagaatgcttgaacattgacgaag  
gtgaggttttaaagcaattctataattatctaaagcaatttgatctgacttctataaaatcgagaaccagccaaaggaaat  
cgaagatgtgggtatcgacattgagaagttgaggaaagagcgगagcgगतccगacgctcttcattgaaggtatगत  
gacaaagatgaggctttctattatcacgaaatcgacaaggagatacगagatगतgaaaaggaaagataacgac  
aaagggaaaacattcaattgaaaaaatcaagaacttaagtacगcttctcaatgggtgggaactcatggaggatg  
acttaagaccgagttcataaagatggcaatcaaaaatatacatttgaatatgtgaaagggataaaggggaagaggca  
aaattcttgaagatcacgggcatagaattttattaa

Integrase 13 *A. thaliana* codon optimized sequence

atggctgctggaatttacatacगagtgagtactcaggagcaggccagtगaggggcattccatagaagccaaaagaa  
aaaattggcgtcttactcgगagattcaggggtgggatgactataggtttatattgaggagggaaatccgggaagaatac  
aaatcgccaagcttaaaccttattggगcatattgaaaagggtaaaattaatactactcgtgaccgattगaccgt  
ctaacgaggtcagtaatcgattgcacaagttattgaatttctgaggaacacggttcgcttcaagtccgcaactgaaa  
cttacgacacaaccaccgcaaacggaaggatगतatggggattगतcactcctgcccagtgggagacggaaaata  
tgagcgaacgtataaaactgaatctgaacacaaagtactagtagagggggaaaggggtgggctatcccctacggat  
ttgatctaagtगतgacgaaaagctagtgaaaaatgaaaaagtgaattctgctggataggtggगagcगतgaaaa  
tggatggtccgcaatcgaatcgtaattacctgaatcttacgaacaatgaccgaaattggagtccgaatggcgtcctgcg  
tctactcgaaaaccggcgtctacggggcgaccgttggaacgataagatगतgagaacacacaggaaggaattat  
cagtaaagagaggttcaatगतgacgaaatcctagगतatcgttctattcatcacaggcgtगतgtaagggtaacct  
cattttcagggcgattaaगतtccggtttगतcगacattgagcgtaaacगतtcatcaagaagcgaaggatggc  
accgगतtctgtggcgtttगतatगतgccगccctgtattaaacaaaataaatacaatctgcaattggcgagggcacगत  
ttctgaaggctctaacगतtगतtccacgggtggaattcaaactgttgaggacगaggtcatccctaagaagगतgagc  
गagगतctggaagtcactcaacगतatगतgaaagagagaaaagtatcaaaaagcgtgggctctगतttगत  
gtctgacgacगagttgaaaagcttatggtgगaccgगagगactacगतgaatgcaagcगaaactcगagcttgcg  
aggaccctataaaaatcgacgaaacttactaaaggगतatgtttatgttccatcaaaccttcaacgacctggगतccg  
agaaacगaaaggगतtcatctcaagtttattcgtacaatacgttacaccgtgaaaggaacगaaccaataagggcग  
acaagगcaagactgggaaaggcaagcगaaagtcataattactगaggtagaattctatcaataa



phiC31 *A. thaliana* codon optimized sequence

atggacacatacgcgggtgcctatgacaggcagctcccgtgaacgtgaaaatagtagtgccggctccccgccacgcag  
cgttccgccaatgaggacaaagcagcagacctccaacgagaggttgagcgagatgggggaggttcaggttcgtagg  
ccacttctgaagcgcccggcacttccgctgctggcaccgagagaccgagttcgagcgtataactaaatgagtcg  
cgagcgggtcgactcaacatgataaattgtatgacgttagtaggttctccagactgaaagtaattgatgcaataccaata  
gtatcagagcttctagccttggcggttacgatagtgagcaccagggagggcggtattccgacaaggggaacggtatggatctt  
atacatctaattatgcgacttgatgccagtcacaaggaatcctccctcaagagcgccaagattcttgataactaagaaccta  
cagagggagctcgggggttacgtcgggggaaaagccccgtacggtttgaactgtcagtgaaaccaaggagattacg  
aggaacgggaggatggtcaatggtgtcataaacaagttggcgactcaactactccattgactggtccggttcgagtttgag  
ccagacgtaattcgatggtggtggcgtgagatcaaaactcataagcatttacctttaaaccgggagccaggcggcaat  
acaccccggaagcatcacaggcctgtgcaaactgatggacgcccagcgtgtgccgaccagaggcgagactattggg  
aaaaagactgcctcctcagcatgggatcccgtacagttatgagaattttacgtgaccccagaatcgctggcttcgcagc  
ggaagtgattataaaaagaagccagatggcacaccacaacaaaaattgaggggtacaggatccagagagatcct  
atcactttaaggccagttgagttgattgtggaccaataattgaacccgagtggtatgagcttcaggcctggttgatg  
gaagaggtcgtgaaaaggcctcagccgtggacaggccatcctatctgctatggacaaattgtattgcaatgcggcgc  
ggtgatgacaagcaagcgaggcgaggaatctatcaaggacagctacaggtgctgtagacgtaaagttgtgaccctca  
gcacctggccagcatgagggtagctgcaatgtctccatggcggcgttagacaagttcgtggctgaacgtatattaaaca  
aattcgacatgcagagggcgacgaggagactctagcgttactatgggaagccgcgctcgattgggaagttaacgga  
ggcgcctgaaaaagcggagagagagctaatctcgtagccgagcgtgctgatgactgaatgcgctagaggagctgt  
atgaggaccgtgccgcccgggcatagatgggcccgttggaaaggaagcatttccgtaaacagcaagcggctctgaca  
ctgctcagcaaggagccgaagagcgttagcggagctcgaagccgcccaggcgcctaaactccactcgatcagtg  
gtccctgaagacgaggacgcccgtaccgactggcccaaatcttgggtggggtcgagcatccgttgatgacaagcgtgat  
ttgtgggtctatttgcgacaagatcgtagtgactaaatcaactacaggccgtggccagggcacgccaatcgagaaact  
gagcagcataacatgggctaaccacctacggacgacgatgaagacgatgcacaagatggaactgaggacgttcgag  
catag

Bxb1 *A. thaliana* codon optimized sequence

atgagggccttagtctgtatccgactatccagggcactgatgccaccacatcaccagaaagacaactagagtcattgcc  
agcaattgtgcgacaaagaggatgggatggttagggcgttgcggaggacctagatgatcaggtgccgtggaccccttt  
gatagaaaacgaagaccaaacctagcgcgttggctcgtttgaagagcaaccgttgatgtatcgtggcatacaggggt  
ggatagactaactaggagtatacgcacacctacgacagttagtagcattgggctgaggatcataagaagctagtggtctctg  
caactgaggcccatttcgacacgaccacccctttgcccgggttgcattgctgtaattggcaccgttagcacaatggaac  
tcgaggcaatcaaggaaagaaaccgaagcgcagcacacttaacattcgagccgggaagtaccgaggctctctgccc  
ccttggggctatctccgacgaggggtggatggtgaatggagattagtagcagaccccgctcagagggaaaggattctag  
aagtgtaccaccgagtggtggataatcacgaaccgctccacctcgtggcgcacgacttaaacgctcgtggggtgctctct  
ccaaaggactatttgcgagcttcagggctgtaacctcaggggagagagtggtccgctactgctttgaaacgtagtagt  
attagcagggcaatgtaggatagctacgctaaacggcaaaaccgtccgagatgatgacggcgcgcccgtagtagca  
gctgaacctatactgacaagagaacagcctgagccttacgtgcggagttagtttaagactagcaggggcaaaaccagca  
gttagtagccttactgttactcagggctcgttttgcgagctctgtggtgagcccgcgtacaaattcgtggtggggggcgt  
aagcaccgcgcttaccgttctgtagtagtgggctcccaagcattgcccgaatggaaccgtggcaatggcggagtggg  
acgcttctgcgaggagcaagatattgatctcctcggggatgctgaaccgactggagaaagtgtgggtagctgggtctgatt  
ctgctgtcagctagcggaaagtaaatgctgaactagtgacttaacgtccctcattgggtctccggcatatagagctggca  
gccctcaaagggaagcccttgatgcgctatcggccctcgcagcagagacaggaagaattggaggggctggaggct  
aggccatcaggctgggagtgccgagaaacggggcagcgttgggtgattggtggagagagcaggatacggccgcta  
aaaatacgtggcttaggagtagaacgtgcgtctgacgtttgatgtcgtggtggtctcacacgaactattgactttggtgact  
tgcaagaatacagcagcacttacgattgggaagtgtgttgaacgtctacatacgggcatgagttag

## References

1. Yang, L. *et al.* Permanent genetic memory with >1-byte capacity. *Nat. Methods* **11**, 1261–1266 (2014).
