# Supplementary material for: Genetic switches designed for eukaryotic cells and controlled by serine integrases
Source: PubMed Central journal article supplement (PMC7244727; doi:10.1038/s42003-020-0971-8), 2020-05-22
Supplement: 42003_2020_971_MOESM7_ESM.pdf [file 42003_2020_971_MOESM7_ESM.pdf]

## Description of Additional Supplementary Files

### **File Name: Supplementary Data 1**

**Description:** HEK 293T cells aligned sequences. DNA cloned sequence reads we obtained after *egfp* inversion by Int activity in pSG plasmids in HEK 293T cells aligned with the expected flipped sequence.

### **File Name: Supplementary Data 2**

**Description:** Bovine fibroblasts aligned sequences. DNA cloned sequence reads we obtained after *egfp* inversion by Int activity in pSG plasmids in fibroblasts aligned with the expected flipped sequence.

### **File Name: Supplementary Data 3**

**Description:** *A. thaliana* protoplasts aligned sequences. DNA cloned sequence reads we obtained after *egfp* inversion by Int activity in pSG plasmids in protoplasts aligned with the expected flipped sequence.

### **File Name: Supplementary Data 4**

**Description:** *A. thaliana* protoplasts aligned sequences. DNA cloned sequence reads obtained after CaMV 35S promoter inversion by Int activity in pSP plasmids in protoplasts aligned with the expected flipped sequence.

### **File Name: Supplementary Data 5**

**Description:** PBMCs aligned sequences. DNA cloned sequence reads we obtained after *egfp* inversion by Int activity in pSG plasmids in PBMCs from three donors aligned with the expected flipped sequence.
